1 **Occurrence of non-apical mitoses at the primitive streak, induced by relaxation of**  
2 **actomyosin and acceleration of the cell cycle, contributes to cell delamination during mouse**  
3 **gastrulation.**

4  
5 **Authors**

6 Evangéline Despin-Guitard<sup>1</sup>, Steffen Plunder<sup>2</sup>, Navrita Mathiah<sup>1</sup>, Eric Theveneau<sup>4</sup> & Isabelle  
7 Migeotte<sup>1</sup>.

8  
9 **Affiliations**

10 1, Université Libre de Bruxelles, IRIBHM, Brussels B-1070, Belgium.

11 2, Institute for the Advanced Study of Human Biology (ASHBi), Kyoto University Institute for Advanced  
12 Study, Kyoto University, Yoshida-Konoe-cho, Sakyo-ku, Kyoto 606-8501, Japan.

13 4, Molecular, Cellular and Developmental biology department (MCD), Centre de Biologie Intégrative  
14 (CBI), University of Toulouse, CNRS, UPS, 31062 Toulouse, France.

15  
16 **ABSTRACT**

17 During the epithelial-mesenchymal transition driving mouse embryo gastrulation, cells at the  
18 primitive streak divide more frequently than in the rest of the epiblast, and half of those  
19 divisions happen away from the apical pole. These observations suggest that non-apical  
20 mitoses might play a role in cell delamination and/or mesoderm specification. We aimed to  
21 uncover and challenge the molecular determinants of mitosis position in the different regions  
22 of the epiblast through a combination of computational modeling and pharmacological  
23 treatments of embryos.

24 Blocking basement membrane degradation at the streak had no impact on the asymmetry in  
25 mitosis frequency and position. By contrast disturbance of actomyosin cytoskeleton or cell  
26 cycle dynamics elicited ectopic non-apical mitosis and showed that the streak region is  
27 characterized by local relaxation of the actomyosin cytoskeleton and less stringent regulation  
28 of cell division. These factors are essential for normal dynamics at the streak but are not  
29 sufficient to promote acquisition of mesoderm identity or ectopic cell delamination in the  
30 epiblast. Exit from the epithelium requires additional events, such as detachment from the  
31 basement membrane.

32    Altogether, our data indicate that cell delamination at the streak is a morphogenetic process  
33    which results from a cooperation between EMT events and the local occurrence of non-apical  
34    mitoses driven by specific cell cycle and contractility parameters.

35

## 36 INTRODUCTION

37 Epithelial-mesenchymal transition (EMT) is a reversible process by which a static epithelial cell  
38 becomes motile through the acquisition of a mesenchymal phenotype. It involves a loss or  
39 change in intercellular junctions, reorganization of the cytoskeleton, a switch from apical-  
40 basal to front-rear polarity, and remodeling of the extracellular matrix<sup>1,2</sup>. EMT is a fluid non-  
41 linear spectrum in which cells can adopt intermediate phenotypes with various levels of  
42 epithelial and mesenchymal features<sup>2</sup>.

43 Gastrulation, an evolutionary conserved developmental event through which multiple germ  
44 layers arise from a single epithelium, occurs through EMT-mediated cell delamination. In the  
45 mouse embryo, gastrulation takes place in the primitive streak (PS), a structure specified in  
46 the posterior region of the epiblast at embryonic day (E) 6<sup>3</sup>.

47 One of the earliest steps of gastrulation EMT is the degradation of the basement membrane<sup>4,5</sup>.  
48 Cells maintain tight and adherens junctions until they exit the epiblast<sup>3</sup>, then their E-Cadherin  
49 levels diminish as they travel in the mesodermal wings. Snail is a major EMT master  
50 transcription factor implicated in E-Cadherin down-regulation; it is critical for the adequate  
51 establishment of the three germ layers<sup>6</sup>. Interestingly, PS cells can delaminate in *Snail*  
52 knockout embryos, but nascent mesoderm maintains an intermediate level of E-cadherin and  
53 fails to migrate away<sup>3</sup>. PS cells asynchronously delaminate through apical constriction  
54 followed by retraction of the apical process and delamination on the basal side<sup>4,7</sup>. 3D time-  
55 lapse imaging of gastrulating mouse embryos revealed that apical constriction occurs in a  
56 pulsed ratchet-like fashion<sup>8</sup>.

57 In mouse, cell number is tightly regulated at the gastrulation stage. Indeed, experiments  
58 involving reduction or increase of embryo size highlighted a remarkable ability to compensate  
59 through change in proliferation rate<sup>9,10</sup>. Consistent with what was first observed by Snow in  
60 1977<sup>11</sup>, immunostaining on sections and live imaging of mosaically labeled mouse embryos at  
61 the gastrulation stage showed that the frequency of mitoses is two times higher at the streak,  
62 compared to the rest of the epiblast<sup>12</sup>. Accordingly, single-cell RNA sequencing revealed that  
63 cells at the PS have a higher G2/M phase score than other epiblast cells<sup>13</sup>. Quantification of  
64 cell cycle length in rat embryos also indicated that cells at the PS are cycling faster than in the  
65 rest of the epiblast<sup>14</sup>.

66 The epiblast is a pseudostratified epithelium, where nuclei undergo Interkinetic Nuclei  
67 Migration (INM). In S phase, nuclei are basal. They are translocated toward the apical side

68 during G2, so that mitosis occurs apically<sup>15</sup>. Live imaging confirmed the existence of such  
69 nuclear movements in the mouse epiblast<sup>16</sup>. Staining for Phospho-Histone H3, a marker for M  
70 phase, indicated that mitosis is indeed apical in the epiblast, except in the PS where about  
71 40% of mitoses happen away from the apical pole<sup>11,12</sup>. Live imaging of embryos in which a  
72 small number of epiblast cells were labeled with membrane targeted GFP (thereby allowing  
73 tracking of cell shape and fate) showed that most cells undergoing non-apical mitotic rounding  
74 retained a basal attachment until cytokinesis, yet preferentially gave rise to one or two cells  
75 that delaminated to become mesoderm<sup>12</sup>. Non-apical mitoses have been described in other  
76 pseudostratified epithelia. For example, in the dorsal neuroepithelium of chick embryos, in  
77 which neural crest cells arise by EMT, non-apical mitoses are found in similar proportions than  
78 in the mouse PS. Importantly, abrogation of non-apical mitosis leads to a severe delay in  
79 neural crest cell delamination<sup>17,18</sup>.

80 All these observations indicate that PS cells have specific cycling properties and a high rate of  
81 non-apical mitoses that might be linked to their ability to extrude. We used experimental and  
82 in silico approaches to assess the functional relationship between proliferation rate, INM, cell  
83 contractility and the occurrence of non-apical mitoses in the epiblast and whether some of  
84 these parameters might actively contribute to cell delamination at the streak. Here we found  
85 that non-apical mitoses can be favored by multiple stimuli such as cytoplasmic actomyosin  
86 relaxation, a higher proliferation rate, a shorter G2, or detachment from the basement  
87 membrane. All these inputs act in concert at the PS. Importantly, non-apical mitoses promote  
88 but are not sufficient to provoke actual extrusion, which can only occur if tissue integrity is  
89 impaired.

90

## 91 RESULTS

92 We previously established that non-apical mitoses at the PS primarily give rise to basal  
93 delamination of nascent mesoderm cells<sup>12</sup>. Therefore, we set out to identify the factors  
94 controlling the occurrence of non-apical divisions and assess whether they are causally linked  
95 to cell delamination. Variations in the position within the epithelium at which a cell divides  
96 could come from differences in apicobasal polarity, actomyosin contractility or cell cycle  
97 parameters (such as total duration of the cycle or duration of the G2/M phase). Thus, we  
98 performed a pharmacological screen targeting these cellular characteristics. While genetic  
99 manipulation allows for spatial control, it lacks precision in intensity and duration, which can  
100 complicate the interpretation of a phenotype, particularly in a highly dynamic context. The  
101 pharmacological approach addresses these limitations as it allows establishing optimal  
102 posology and recording the consequences of short-term alterations. One caveat is that all cells  
103 (epiblast and PS) are simultaneously targeted. To circumvent this, we used a computational  
104 model of proliferating pseudostratified epithelium in which all parameters can be controlled  
105 at the single cell level.

106 For biological experiments, we established a systematic protocol of measurements on  
107 embryos sectioned along the proximal-distal axis (Figure 1A, B). Sections were positioned  
108 along the anterior-posterior axis based on anatomical landmarks such as the long axis of the  
109 oval embryo shape and the morphology of visceral endoderm cells, as well as molecular  
110 markers including collagen IV for the basement membrane. The epiblast was divided into  
111 three regions: anterior and posterior halves of the epiblast, and PS, defined as the subregion  
112 of the posterior epiblast where the basement membrane is discontinuous. Staining for mitosis  
113 (Phospho-Histone H3) and nuclei (DAPI) allowed calculating the mitotic and non-apical mitotic  
114 indexes (Figure 1B). We quantified the percentage of basement membrane (collagen IV)  
115 degradation as a readout for EMT initiation and progression (Figure 1A).

116 For the modeling of pseudo-stratified epithelium, we relied on a model originally developed  
117 on the chick neuroepithelium<sup>19</sup>. We used an extended version that allows the control of each  
118 parameter in time and space at the single cell level, described in <sup>20</sup>. Briefly, each cell is  
119 approximated by a nucleus, an apical point, and a basal point. The two points are connected  
120 to the nucleus through dynamically adjustable springs representing the viscoelastic properties  
121 of the cytoplasm (Figure 1C). The nucleus is composed of an outer soft core and an inner hard  
122 core. Hard cores of neighboring cells cannot overlap while soft cores can but are subjected to

123 a repulsion force. This allows representing packing and compression occurring between cells  
124 in a dense tissue. Apical cell-cell adhesions are modeled by springs between the apical points  
125 of neighboring cells (aa). On the basal side, basal points are attached to a fixed basal line  
126 representing the basement membrane. Basal points cannot overlap or swap positions. The  
127 cell cycle and INM movements are divided into three phases. The first phase corresponds to  
128 G1, S, and early G2, where movements are controlled by environmental constraints generated  
129 by neighboring cells. The second phase corresponds to late G2, where the pre-mitotic rapid  
130 apical movement (or PRAM) is simulated by contraction of the apical-nuclei string (aN) to bring  
131 nuclei to the apical pole, and extension of the basal-nuclei spring (bN) to accompany the  
132 movement. These settings are maintained in the third phase, the M phase, which results in  
133 the formation of two daughter cells. As the model is in 2D, most daughter cells are generated  
134 out of the 2D plane. To adapt the model to the epiblast size and configuration, a maximum  
135 height was set to allow no more than three pseudo-layers of nuclei, and dividing cells kept a  
136 basal attachment (Figure 1D).

137

138 **The difference in frequency and location of mitosis at the PS relative to the rest of the**  
139 **epiblast is independent of basement membrane degradation.**

140 In the mouse embryo, perforations in the basement membrane separating epiblast and  
141 visceral endoderm are distributed uniformly prior to migration of the Anterior Visceral  
142 Endoderm (AVE), the organizer that determines the anterior-posterior axis and therefore the  
143 position of the streak. Upon axis specification, perforations become more abundant in the  
144 posterior half of the embryo. These holes in the basement membrane are generated by a  
145 Nodal-dependent increase in the expression of Matrix Metalloproteinases (MMP) 2 and 14,  
146 and are necessary for embryo growth, PS morphogenesis, and gastrulation<sup>21</sup>. In EMT, loss of  
147 basal attachment due to basement membrane degradation is frequently associated with a  
148 disruption in apical-basal polarity. However, during mouse gastrulation, polarity markers are  
149 maintained in the PS<sup>4,8,22</sup>. This suggests that basement membrane degradation might be  
150 required for the occurrence of non-apical mitosis, independently of the loss of polarity.

151 To test this, we cultured pre-gastrulation E6 embryos for 6 hours with a combination of 20  $\mu$ M  
152 Pan-MMPs inhibitor prinomastat hydrochloride and 100  $\mu$ M MMP14 inhibitor, as previously  
153 described<sup>21</sup>. After incubation, embryos were fixed, and transverse cryosections were  
154 immunostained for Phospho-Histone H3, Collagen IV, nuclei (DAPI), and F-actin (phalloidin).

155 Additionally, adjacent sections were stained for Cerberus 1 (Cer1) to identify the location of  
156 the AVE. We confirmed the abrogation of basement membrane degradation in embryos  
157 treated with MMPs inhibitors (Figure 2A, B). However, there was no significant difference in  
158 mitotic and non-apical mitotic indexes (Figure 2C, D), nor in the non-apical mitosis ratio  
159 (Supplementary 1A) throughout the epiblast relative to untreated embryos. After 8h of  
160 incubation (Supplementary 1D), some cells in the streak region acquired a mesenchymal  
161 morphology, but they were not able to cross the basement membrane (Figure 2E).

162 Before modelling the impact of detachment from the basement membrane *in silico*, we first  
163 had to calibrate the parameters of cell cycle and INM allowing to recapitulate the percentage  
164 of non-apical mitoses observed *in vivo*. As the velocity of PRAM is controlled by the  
165 contraction of the apical-to-Nucleus (aN) spring in the model, we tested a range of strength  
166 values for aN (Figure 2F). We simulated 200 repetitions of 30 proliferating cells with a cell cycle  
167 of  $6 \pm 0.5$ h or  $3 \pm 0.5$ h, corresponding to measured values for epiblast and PS cells,  
168 respectively<sup>11,14</sup>. The percentages of non-apical mitoses observed at the PS (circa 40%) could  
169 only be reached at very low values of aN, suggesting that an almost complete loss of PRAM is  
170 necessary. In addition, we noted that a faster cell cycle favors non-apical mitoses even at  
171 higher PRAM intensity. Indeed, the frequency of non-apical mitoses for medium values of aN  
172 reached a plateau at 7% with a cell cycle length of 3h, and only 1% with a length of 6h. Based  
173 on these simulations, we used the following as default parameters:  $6 \pm 0.5$ h of cell cycle and  
174 3 of aN strength for epiblast cells,  $3 \pm 0.5$ h of cell cycle and 0.25 of aN strength for PS cells  
175 (Figure 2G). We counted the number of PS cells on cross sections of stage E6.5 mouse embryo  
176 and found a mean population size of 19 PS cells per section<sup>12</sup>. Thus, we set the size of the PS  
177 population at 19 cells, surrounded by 20 epiblast cells on each side. Simulations start with a  
178 period of 6 hours during which all cells are attached basally. Then there is an 18h long window  
179 of opportunity for PS cells to detach from the basal line, which is referred as event **B** (Figure  
180 2G, F) and represents basement membrane degradation<sup>20</sup>.

181 We then ran simulations with or without detachment of PS cells from the basal line and  
182 plotted the rate of non-apical mitoses (Figure 2H, I). As observed in embryos treated for 6h  
183 with MMPs inhibitors, impairing detachment from the basal line did not suppress the  
184 occurrence of non-apical mitoses at the PS (Figure 2I, J).

185 Collectively, these data indicate that preventing basement membrane degradation does not  
186 influence the rate of mitoses and non-apical mitoses at the primitive streak.

187 **Actomyosin relaxation is sufficient to drive the appearance of non-apical mitosis in the**  
188 **epiblast.**

189 As INM movements are usually driven by actomyosin in short pseudo-stratified epithelia<sup>15</sup>, we  
190 tested whether a regional modification in actomyosin contractility could be responsible for  
191 the increased rate of non-apical mitosis at the PS.

192 The shape of nuclei in interphase can be used as a readout of the mechanical constraints  
193 exerted on cells<sup>23,24</sup>, which are believed to be particularly high in pseudo-stratified  
194 epithelia<sup>25,26</sup>. We marked nuclear membrane via staining for Lamin B1, the first Lamin subtype  
195 expressed during early development in mouse<sup>27,28</sup>, and calculated the nuclei size ratio by  
196 dividing the short axis length by the long axis length (Figure 3A). A ratio close to 0 corresponds  
197 to an elongated nucleus, indicating that the cytoskeleton is contracted. A ratio close to 1  
198 indicates a round nucleus, reflecting relaxation of the cytoskeleton network. Nuclei shape  
199 ratios were recorded in the anterior, posterior, and PS regions of E6.25, E6.5, and E7 embryos  
200 (Figure 3B, B''). Nuclei in the PS were rounder, compared to the rest of the epiblast, from E6.25  
201 onwards, with a peak at E6.5 and maintenance until E7 (Figure 3C-C''). This is compatible with  
202 a local relaxation of the cytoskeleton at the streak, leading to nuclei shape changes, upon the  
203 onset of gastrulation.

204 The small Rho-GTPase RhoA regulates both actomyosin contractility and cell cycle  
205 progression. In addition, during EMT, RhoA participates in the cellular changes required to  
206 acquire a mesenchymal-like phenotype and migrate<sup>29</sup>. Rho-associated kinase (ROCK), a  
207 downstream effector of RhoA, regulates actomyosin contractility via myosin light chain  
208 phosphorylation<sup>30,31</sup>. In the pseudostratified epithelium of the *Drosophila* imaginal discs,  
209 pharmacological treatment with ROCK inhibitor Y27632 leads to basal accumulation of nuclei  
210 and the appearance of non-apical mitoses<sup>32</sup>. To investigate the link between mitosis location  
211 and actomyosin dynamics in the mouse epiblast, we cultured E6.5 embryos for 2h with 40  $\mu$ M  
212 Y27632. Embryos were then fixed, and transverse cryosections were immunostained for  
213 Phospho-Histone H3, Collagen IV, nuclei (DAPI), and F-actin (phalloidin). There was no change  
214 in the mitotic index (Figure 3D, E). However, a 2-fold increase in the non-apical mitotic index  
215 (and a 10-fold increase of the non-apical mitosis ratio) were recorded in the anterior and  
216 posterior epiblast (Figure 3D, F, Supplementary 1B). This is compatible with an actomyosin-  
217 driven INM in the epiblast: indeed, it is likely that disturbing actomyosin contractility affects  
218 the ability of cells to drive their nuclei to the apical surface in G2, which results in mitosis



219 occurring in ectopic location. Interestingly, non-apical mitotic index remained unchanged at  
220 the PS (Figure 3D, F), strongly suggesting that actomyosin contractility is intrinsically low in PS  
221 cells. Upon ROCK inhibition, nuclei shape was rounder in the anterior and posterior epiblast  
222 (Figure 3G), confirming it induced a relaxation of the actomyosin cytoskeleton, while the shape  
223 of nuclei in the PS did not change (Figure 3G). The effect of the inhibitor was reversible, as  
224 embryos treated for 2h with 40  $\mu$ M of ROCK inhibitors then washed were able to adjust rapidly  
225 and survive overnight in culture (Supplementary 1E).

226 To further explore the influence of cytoskeleton contractility on the occurrence of non-apical  
227 mitoses, we performed simulations with a reduced strength for all springs: aN and bN for the  
228 cell body/cytoplasm and aa for apical cell-cell adhesion (Figure 3H, I; light purple).  
229 Interestingly, such global relaxation increased the frequency of non-apical mitoses in the  
230 epiblast and reduced it in the PS (Figure 3H). Thus, we set out to assess the relative  
231 contributions of the cytoplasmic springs (aN, bN) that control INM/PRAM and of the apical  
232 adhesion spring (aa), by relaxing them independently (Figure 3H, I; pink and orange). Relaxing  
233 aN/bN strongly promoted non-apical mitoses in the epiblast but did not affect PS cells.  
234 Relaxing aa mildly promoted non-apical mitoses in the epiblast and lowered their frequency  
235 in the PS. It is interesting to note that in all simulations with aa relaxation the tissue  
236 experienced severe deformations (Figure 3H, I). The changes obtained in the scenario where  
237 all springs were relaxed are compatible with what we observed in embryos treated with a high  
238 dose of ROCK inhibitor (400  $\mu$ M): those displayed severe morphological defects  
239 (Supplementary 2A, B); the mitotic index was decreased in all regions of the epiblast  
240 (Supplementary 2C) while the non-apical mitotic index was increased in the anterior and  
241 posterior epiblast but decreased in the PS (Supplementary 2D). We thus interpret that the  
242 effects observed at 40  $\mu$ M of ROCK inhibitor correspond to a mild inhibition of the cell  
243 cytoskeleton contractility that can be modeled by the relaxation of only the INM springs.

244 Collectively, these experimental and simulated data indicate that a mild inhibition of ROCK  
245 generates non-apical mitoses in the epiblast primarily by affecting cytoplasmic actomyosin  
246 activity rather than apical actomyosin. This suggests that INM is governed by actomyosin in  
247 the epiblast and that, comparatively, actomyosin contractility is weak in PS cells, leading to  
248 the appearance of non-apical mitoses.

249

250

251 **Cell cycle regulation is less stringent in the PS, compared to the rest of the epiblast.**

252 The complex formed by Cyclin-dependent Kinase 1 (CDK1) and CyclinD1 is critical for the  
253 control of cell entry into mitosis. In the avian neuroepithelium, overexpression of CyclinD1  
254 leads to the appearance of non-apical mitoses<sup>33</sup>. In zebrafish retina, CDK1 is required for the  
255 rapid basal to apical movement of nuclei during G2<sup>34</sup>. Therefore, we chose to  
256 pharmacologically target CDK1, negatively using a CDK1 inhibitor (R03366), and positively via  
257 a Wee1 inhibitor (PD16685). Wee 1 is a nuclear kinase that regulates mitosis by inhibiting  
258 CDK1 through phosphorylation. Wee1 inhibition enables to bypass the G2/M checkpoint<sup>35</sup>.

259 A 2h incubation with 175  $\mu$ M of CDK1 inhibitor abrogated all mitosis, confirming that targeting  
260 CDK1 regulation can rapidly affect the cell cycle in the epiblast (Figure 4A-C). Embryos were  
261 able to recover from the treatment and developed normally (Supplementary 1E). With the  
262 goal to increase the frequency of mitoses without major morphological anomaly, we  
263 performed a dose-response analysis for the Wee1 inhibitor (5, 10, 20, 40, and 80  $\mu$ M for 2  
264 hours). Embryos were fixed directly after incubation. We measured the percentage of  
265 basement membrane degradation as well as the mitotic and non-apical mitotic indexes on  
266 transverse cryosections immunostained for Phospho-Histone H3, Collagen IV, nuclei, and F-  
267 actin (Figure 4D). In the anterior and posterior epiblast, we observed a dose-dependent  
268 increase of the mitotic index, indicating an acceleration of the cell cycle, as well as an increase  
269 of the non-apical mitotic index and non-apical mitosis ratio (Figure 4D-F; Supplementary 1C).  
270 We previously showed that an acceleration of the cell cycle is sufficient to trigger non-apical  
271 mitoses (Figure 2F), therefore some of the increase of non-apical mitoses in the epiblast upon  
272 treatment with Wee1 inhibitor might be linked to the global increase in mitotic index.  
273 However, as PRAM take place in G2, Wee1 inhibition might also contribute to the higher rate  
274 of non-apical mitoses by shortening the window of opportunity for PRAM to occur. By  
275 contrast, the frequency and location of mitoses in the PS stayed constant except at high doses  
276 of drug (40-80  $\mu$ M) at which most cells were entering mitosis (Figure 4E, F). These data indicate  
277 that cells at the PS were less sensitive to Wee1 inhibition compared to the rest of the epiblast,  
278 strongly suggesting an intrinsically shorter cell cycle and G2 duration in PS cells.

279 To assess the relative impact of G2 and total cell cycle duration, we performed simulations in  
280 which we modulated their duration independently or simultaneously. The model has a  
281 simplified version of the cell cycle in which PRAM forces are applied through G2 and M. Thus,  
282 to mimic the effect of the Wee1 inhibitor in shortening biological G2 and the associated

283 duration of PRAM forces, we reduced the total duration of simulated G2+M by half. In the  
284 control situation, epiblast cells cycle every  $6 \pm 0.5$ h and PS cells every  $3 \pm 0.5$ h. All cells have a  
285 G2/M of 30 minutes each (Figure 4G, H; dark purple). If all cells were forced to cycle every  $3 \pm$   
286  $0.5$ h at constant G2/M duration, it only generated a marginal increase of non-apical mitoses  
287 in the epiblast (Figure 4G, H; light purple). If both cell types kept their respective cell cycle  
288 length but were forced to have a G2/M of 15 minutes each, there was a massive increase of  
289 non-apical mitoses in the epiblast (Figure 4G, H; pink). If both changes were combined (cell  
290 cycle  $3 \pm 0.5$ h, G2/M 15 min in all cells), it did not generate a further increase of non-apical  
291 mitoses in the epiblast (Figure 4G, H; orange). By contrast, all these changes had negligible  
292 effects on the PS. These results indicate that specifically affecting G2/M duration has more  
293 impact on the rate of non-apical mitoses than shortening the whole cell cycle without affecting  
294 G2/M duration. Overall, these data indicate that an acceleration of the cell cycle and a  
295 shortened G2 duration contribute to the increased incidence of mitoses and non-apical  
296 mitoses observed at the primitive streak.

297

#### 298 **The rate of non-apical mitoses correlates with the occurrence of basal extrusion.**

299 In view of the results from pharmacological screening and in silico modeling, we conclude that  
300 relaxation of cytoplasmic actomyosin, a faster cell cycle, and a shortening of the G2 phase  
301 collectively contribute to the increased incidence of non-apical mitoses at the PS during  
302 gastrulation. Given that in vivo time-lapse imaging showed that cells undergoing non-apical  
303 mitosis primarily gave rise to basally extruding mesodermal cells<sup>12</sup>, we wondered if those  
304 mechanisms might also be upstream of basal extrusion.

305 Interestingly, computational modeling of EMT in a tall pseudostratified epithelium using the  
306 same model indicated that the position of nuclei correlates with the directionality of  
307 extrusion<sup>20</sup>. In particular, basal positioning (defined as more basal than the average position  
308 of nuclei) specifically favors basal extrusion. Therefore, some of the experimental and  
309 simulated experimental conditions we tested might have a broader impact on nuclei  
310 distribution in the tissue than the position of mitoses. However, in a comparatively flat  
311 epithelium like the gastrulating epiblast it is unclear whether basal positioning has any  
312 importance for extrusion given that all cells have their nuclei relatively close to the basement  
313 membrane at any time point.

314 To assess this, we plotted the rate of basal positioning of nuclei in epiblast and PS for all  
315 simulated conditions (Figure 5A-B). There was a high rate of basal positioning in control PS  
316 cells. Preventing detachment from the basal line or enforcing normal actomyosin contractility  
317 (Figure 5A, PS experimental conditions 2 to 5) prevented basal positioning of nuclei in PS cells.  
318 By contrast none of the treatments affecting contractility or cell cycle parameters were able  
319 to promote basal positioning in epiblast cells, where only a forced detachment from the basal  
320 line was sufficient to generate a high rate of basal positioning (Figure 5A, epiblast  
321 experimental condition 2).

322 Next, we wondered if overall basal positioning of nuclei and the occurrence of non-apical  
323 mitoses were correlated (Figure 5C). This revealed two different patterns: in epiblast cells,  
324 non-apical mitoses occurred in absence of basal positioning unless loss of basal attachment  
325 was enforced (grey square with black outline). In PS cells both parameters were strongly  
326 correlated unless we imposed a relaxation of the springs throughout the tissue, which  
327 completely canceled basal positioning but only lowered the rate of non-apical mitoses (Figure  
328 5C, circles in hot colors). These data indicate that non-apical mitoses and overall basal  
329 positioning of nuclei can be uncoupled. This means that non-apical mitoses can occur even in  
330 absence of a global redistribution of nuclei in the tissue.

331 Next, we looked at a putative correlation between basal positioning and basal extrusion  
332 (Figure 5D) and found a similar relationship: there was a strong positive correlation in PS cells  
333 unless contractility was affected (circles in hot colors), and no correlation in the epiblast unless  
334 epiblast cells were forced to detach from the basal line (grey square with a black outline).  
335 Finally, we looked at the relationship between non-apical mitoses and basal extrusion. Here,  
336 the data were not split in two groups, and we found an overall positive correlation between  
337 the two factors (Pearson  $r = 0.59$ ,  $p = 0.0157$ ).

338 These analyses revealed that non-apical mitoses can specifically occur in absence of overall  
339 tissue disorganization leading to massive basal positioning. In addition, non-apical mitoses are  
340 positively correlated with basal extrusion. However, it is important to note that extrusion itself  
341 only occurs significantly if cells detach from the basal line or if all springs or apical springs are  
342 relaxed. This means that actual delamination requires a condition in which epithelial integrity  
343 is impaired.

344

345

346 **The occurrence of non-apical mitoses is regulated independently of EMT progression.**

347 In control conditions, non-apical mitoses are followed by basal delamination of mesodermal  
348 precursors<sup>12</sup>. Thus, we wondered if any of the pharmacological treatments that led to ectopic  
349 non-apical mitoses might be sufficient to promote ectopic EMT in the epiblast. We monitored  
350 markers of EMT progression, notably the expression of the EMT marker Snail1, the pattern of  
351 E-cadherin and N-cadherin, and the percentage of basement membrane degradation, upon  
352 pharmacological inhibition of ROCK, Wee1, and CDK1.

353 In embryos treated with 40  $\mu$ M of ROCK inhibitor, immunostaining for Snail1 showed that cells  
354 at the PS were still able to transition, and no ectopic EMT site was detected (Figure 6A). This  
355 was confirmed by staining for E-cadherin and N-cadherin, as there was no alteration in the  
356 cadherin switch (Figure 6B). Similarly, we observed no significant change regarding the  
357 percentage, pattern, or localization of basement membrane degradation (Figure 3D; Figure  
358 6D).

359 For Wee1, we focused on embryos treated with 20  $\mu$ M of the inhibitor for 2 hours.  
360 Immunostaining for Snail1, E-cadherin, and N-cadherin indicated that EMT was initiated  
361 normally at the PS (Figure 6A, B). While these conditions lead to a global increase of non-apical  
362 mitoses in all the epiblast (Figure 4D, F; Supplementary 1C), there were no ectopic site of EMT  
363 nor significant change regarding the percentage of basement membrane degradation (Figure  
364 4D, Figure 6A, B, D'). In addition, preventing entry in mitosis by culturing embryos for 2 hours  
365 with 175  $\mu$ M of CDK1 inhibitor did not affect basement membrane degradation, the  
366 expression of Snail1, or the cadherin switch (Figure 4A; Figure 6A, B, D''), indicating that cell  
367 division per se is not necessary for EMT initiation.

368 These data indicate that while local changes in actomyosin contractility and cell cycle  
369 parameters at the PS likely favor the pre-positioning of cells for exit, they are not sufficient to  
370 trigger or block EMT progression.

371

372 **Relationships between EMT, basal delamination, mesoderm specification, and mesoderm**  
373 **migration are complex and nonlinear.**

374 There is evidence that mitosis can influence gene regulation and EMT progression, notably  
375 through the process of gene bookmarking<sup>36,37</sup>. Therefore, we asked whether mitosis frequency  
376 and location could favor mesoderm specification.

377 We examined the phenotypes of embryos carrying epiblast-specific deletion of the small  
378 GTPase *RhoA*, the Guanine exchange factor *Ect2*, and the kinase *Cdk1*, which are involved in  
379 cytoskeleton regulation, cytokinesis, and cell cycle regulation, respectively.  $\Delta^{\text{epiblast}}$  embryos  
380 were obtained from the combination of *RhoA*, *Ect2* and *Cdk1* conditional alleles<sup>38–40</sup> and a Cre-  
381 recombinase under the dependency of the *Sox2* promoter, which is turned on in the  
382 prospective epiblast at E3.5<sup>41</sup> (Figure E, Supplementary 3).

383 Deletion of *RhoA* in the epiblast led to disruption of the pseudostratified arrangement,  
384 detectable from E6.5 onwards (Supplementary 3A-G). There appeared to be a trend towards  
385 a higher mitotic index at E6.5, possibly due to delays in cytokinesis (Supplementary 3C, D).  
386 Basement membrane degradation was detectable in the posterior region, and cells with a  
387 mesenchymal phenotype accumulated at the streak and into the lumen (Supplementary 3E).  
388 This is compatible with an adequate initiation of EMT but a defect in cell migration away from  
389 the PS, like what was observed in *Rac1* epiblast-specific mutants<sup>22</sup>, or *Rac1* and *RhoA*  
390 mesoderm-specific mutants<sup>42</sup>. By E7.5, *RhoA* $\Delta^{\text{epiblast}}$  mutants exhibited severe morphological  
391 defects. Lumens could be spotted within the accumulation of cells on the posterior side of the  
392 embryo, suggesting a disruption of polarity (Supplementary 3F). Similarly, epiblast-specific  
393 deletion of *Cdk1* or the cytokinesis regulator *Ect2* both resulted in a severe phenotype with  
394 developmental arrest (Figure 5E, Supplementary 3H, I). In *RhoA* $\Delta^{\text{epiblast}}$ , as well as *CDK1* $\Delta^{\text{epiblast}}$   
395 and *ECT2* $\Delta^{\text{epiblast}}$  mutants, mesoderm identity was specified, as shown by the expression of the  
396 PS and nascent mesoderm marker *Brachyury* (T) (Figure 6D), and Vimentin (Figure 6E). These  
397 data underscore the critical role for RhoA, CDK1 and ECT2 in maintaining epiblast integrity,  
398 basal delamination at the PS, and cell migration.

399

## 400 **DISCUSSION**

401 At gastrulation, two novel germ layers are generated by delamination of cells from the  
402 epiblast. This process necessarily involves an increase in cell number at the site of cell exit that  
403 is superior to the one required for homogeneous embryo growth. In chick embryos, global  
404 movements in the epiblast precede gastrulation and position PS precursors along the antero-  
405 posterior axis<sup>43</sup>. The mouse PS, however, was shown to arise in situ, without large scale  
406 displacement of epiblast cells<sup>4</sup>. A higher rate of cell division at the streak therefore appears as  
407 a suitable mechanism to fuel gastrulation EMT<sup>11,12</sup>. In addition to its quantitative input, mitosis  
408 may also play a qualitative role, notably through the mechanical impact of mitotic rounding  
409 on epithelial architecture<sup>44</sup>. The apicobasal position of mitosis may be of importance, as one  
410 would instinctively postulate that cells dividing closer to the basal pole have an advantage for  
411 subsequent delamination, even if they only detach apically at the late steps of cytokinesis.

412 Neural crest delamination from the chick neuroepithelium is a well-studied example of EMT  
413 occurring in a middle size pseudostratified epithelium, where the impact of non-apical mitosis  
414 on cell exit was clearly demonstrated<sup>17</sup>. There, biological and computational data highlighted  
415 a role for the reduction of INM in basal positioning and subsequent basal delamination<sup>20</sup>. Loss  
416 of INM in EMT cells increases the probability of basal positioning, while maintenance of INM  
417 in surrounding non EMT cells results in apical crowding and could mechanically favor their  
418 delamination<sup>20</sup>. Interestingly, we find a similar pattern in the epiblast, a short pseudostratified  
419 epithelium where all cells are relatively close to the basal pole. An additional point of similarity  
420 between those EMT events lies in the temporal regulation of INM. Indeed, non-apical mitoses  
421 were detected prior to the initiation of EMT in the pre-streak posterior epiblast<sup>12</sup> and the  
422 prospective neural crest cells<sup>18,20</sup>. These conserved relationship between INM, mitosis  
423 position and delamination in two different epithelia presenting drastically different  
424 morphology and proliferation rates strongly suggest that it could be relevant in multiple  
425 configurations.

426 Apart from the acceleration of the cell cycle (particularly the G2/M phase), we found that a  
427 major factor promoting non-apical mitosis at the PS is relaxation of the actomyosin  
428 cytoskeleton. In silico simulations allowed to separately modify the tension in distinct cellular  
429 regions, which showed that apical actomyosin played little role in INM and was rather  
430 important for tissue stability. Indeed, the integrity and organization of F-actin is maintained in  
431 epiblast apical junctions throughout gastrulation, notably via ASPP2<sup>45</sup>, which prevents apical

432 extrusion. In this context, it is important to note that apical mitoses fight against apical  
433 contractility<sup>19</sup>. Therefore, maintenance of normal INM at the PS would likely prevent apical  
434 constriction and the acquisition of the bottle shape morphology and subsequently lead to  
435 some apical extrusion.

436 Epiblast cells that ingress at the PS to become mesoderm adopt a bottle shape with a  
437 constricted apical surface<sup>4,7</sup>. Delamination is a progressive process that only involves a  
438 proportion of PS cells at a given time. The asynchronous shrinkage of apical junctions is  
439 regulated by a Crumbs2-regulated anisotropy of myosin II localization<sup>7,8</sup>. Similarly, cellular  
440 heterogeneity in the neural crest appears to boost epithelial destabilization and thereby favor  
441 delamination<sup>20</sup>.

442 In addition to the position of nuclei, polarized protrusive activity mediated by the interaction  
443 between  $\alpha4$  and 5 integrins in neural crest cells and the extracellular matrix promotes basal  
444 extrusion<sup>20</sup>. Likewise, nascent mesoderm displays numerous projections mostly oriented  
445 towards the visceral endoderm in the PS, then towards the front in the mesodermal wings.  
446 Those protrusions are required for directional migration, as demonstrated by the mesoderm  
447 migration defects identified in mouse embryos deficient for PTK7, Rac1, Nap1, or  $\beta$ -Pix<sup>22,46-48</sup>.  
448 Developing tissues go through phase transitions between an ordered state (solid-like) and a  
449 disorganized state (fluid-like), which occur at a critical point, the end of phase equilibrium<sup>49</sup>.  
450 During development, being in constant balance around this critical point may allow embryos  
451 to combine robustness and adaptability in order to go through morphogenetic events<sup>49</sup>. Both  
452 mitosis and EMT trigger changes in tissue visco-elastic properties that can participate in  
453 symmetry breaking, suggesting the applicability of rheology concepts to the epiblast of  
454 gastrulating mouse embryos<sup>44</sup>.

455 Through combining ex vivo and in silico experiments we found that gastrulation EMT coincides  
456 with relaxation of the cytoskeleton and change in cell cycle regulation at the primitive streak.  
457 These local changes disrupt the synchronization between apical nuclei movements and  
458 mitosis, leading to an elevated occurrence of non-apical mitoses and basal positioning of  
459 nuclei. This orchestration may ensure the proper progression of gastrulation while  
460 maintaining the integrity of the epithelium (Figure 7) and may be an evolutionarily conserved  
461 strategy common to other events involving EMT in pseudo-stratified epithelia<sup>20</sup>.

462



## 463 MATERIAL AND METHODS

### 464 Mouse breeding and genotyping

465 Mouse colonies were maintained in a certified animal facility in accordance with European  
466 guidelines. Experiments were approved by the local ethics committee (“Commission d’éthique  
467 et du bien-être animal”) under protocols 576N and 725N. Mouse lines were CD1 (Janvier Labs),  
468 mTmG<sup>50</sup>, Sox2-Cre<sup>41</sup>, *RhoA*<sup>38</sup>, *ECT2*<sup>39</sup>, bred on a CD1 background; *CDK1*<sup>40</sup> mice were bred on a  
469 C57BL/6 background. Mouse genomic DNA was isolated from ear biopsies treated for 1 h at  
470 95°C in NaOH to simultaneously genotype and identify animals.

471 For embryo genotyping, embryos were digested in Direct PCR mix (Viagen #102-T) with 1.5%  
472 Proteinase K (Quiagen #19133) for 2 hours at 56 °C, followed by 30 minutes at 90 °C.

473 The following sequences of primers were used for genotyping:

474 Sox2-cre: (F) TGCTGTTTCACTGGTTATGCTG, (R) TTGCCCTGTTTCACTATCCAG.

475 mTmG: (1) AAA GTC GCT CTG AGT TGT TAT, (2) GGA GCG GGA GAA ATG GAT ATG, (3) TCA ATG  
476 GGC GGG GGT CGT T.

477 RhoA fl: (1) AGC CAG CCT CTT GAC CGA TTT A, (2) TGT GGG ATA CCG TTT GAG CAT.

478 RHOA KO: (1) AGG CAT GGA CCA CCA TGT CA, (2) ATG TGC TTC CCG TGT CTA GT.

479 ECT FL: (1) GCA CTC CAA TTA TGA AGC (2) CAA TAT GTT GGG TAG AGA GAT GGC.

480 ECT KO: (1) CAA TAT GTT GGG TAG AGA GAT GGC (2) TCC TCC GGG TGG ACC AGA G.

481 CDK1 FL: (F) CCA GGG TGA CCT TGT CGT, (R) AGC CTG CCT CCA CTT CCA.

482 CDK1 ko: (1) TTCTCCACGCTTGTCTCCAA (2) CAGCTTTAGGAGTGCAGGC.

483

### 484 Antibodies

485 Antibodies for mouse embryo staining were: Goat anti-collagen IV (MERK #AB769, 1:500),  
486 rabbit anti-Phh3 (Sigma #SAB4504429, 1:500), rabbit anti-E-cadherin (Cell signaling #3195S,  
487 1:500), rabbit anti-laminB1 (abcam #ab229025, 1:250), sheep anti N-cadherin (R&D #AF64216,  
488 1/100), rabbit anti-vimentin (abcam #ab92547,1:200), goat anti-Brachyury (R&D #AF2085,  
489 1/100), rabbit anti-caspase3 (R&D # AF835, 1:250), goat anti-snail (R&D #AF3639, 1:100). F-  
490 actin was visualized using rhodamine phalloidin (abcam #ab235138, 1:1000), and nuclei using  
491 DAPI (Sigma; 1:1000). Secondary antibodies were anti-goat Alexa Fluor 647 (Invitrogen  
492 #A21447, 1:500), anti-rabbit Alexa Fluor 488 (Invitrogen #A21206, 1:500), anti-sheep Alexa  
493 fluor 647 (Invitrogen #A11016, 1:500), anti-rabbit Alexa Fluor 647 (Jackson #711-605-152,  
494 1:500) and anti-goat Alexa Fluor 488 (Invitrogen #A32814, 1:500).

495 **Embryo recovery, staging, and pharmacological treatment**

496 Embryos were recovered at the appropriate time point after observation of a vaginal plug at  
497 day 0. E6.5 and E7.5 embryos were dissected in dissection medium using #5 forceps and  
498 tungsten needles under a transmitted light stereomicroscope. Dissection medium was  
499 composed of Dulbecco's modified Eagle medium (DMEM) F-12 supplemented with 10mM  
500 HEPES and L-glutamin (Thermofisher, #11039047) with 10% Fetal Bovine Serum  
501 (Thermofisher, #10270106) and 1% Penicillin/Streptomycin (P/S). Bright-field pictures of the  
502 litter or single embryo were taken before any manipulation to ensure adequate staging. For  
503 pharmacological treatment, E6.5 embryos were allowed to recover in equilibrated culture  
504 medium (50% DMEM F12 (Thermofisher, # 21041025), 50% rat serum (Janvier), 1% P/S ) in an  
505 incubator (37°C, 5% CO<sub>2</sub>) for 1 h. Embryos were then transferred to 15-wells ibidi (#81507)  
506 with 30 µl of equilibrated culture medium containing inhibitors or control reagent depending  
507 on what chemical the inhibitor was diluted in. Bright-field pictures were taken at t0 and after  
508 the incubation with inhibitors to assess embryo growth. For the post-treatment survival test,  
509 medium was replaced with fresh culture medium and embryos were cultured over night at  
510 37°C.

511  
512 Inhibitors were: PD16685 (Wee1 inhibitor, MECK #PZ0116, diluted in dH<sub>2</sub>O), R03366 (CDK1  
513 inhibitor, Sigma #217699 in DMSO), Y27632 (Rock inhibitor, Abcam #ab120129 in dH<sub>2</sub>O),  
514 Prinomastat hydrochloride (Pan-MMPs inhibitor, Sigma #PZ198 in dH<sub>2</sub>O), NSC405020 (MMP14  
515 inhibitor, Tocris #4902/10 in ethanol).

516

517 **Immunofluorescence on mouse embryos**

518 For immunofluorescence, embryos were fixed in PBS containing 4% paraformaldehyde (PFA)  
519 for 2h at 4°C. Embryos were cryopreserved in 30% sucrose, embedded in OCT and sectioned  
520 at 7µm. Staining was performed in PBS containing 0.5% Triton X-100, 0.1% BSA and 5% heat-  
521 inactivated horse serum. For whole mount, embryos were imaged in PBS 1X. Alternatively, to  
522 enhance optical clarity, E6.5 and E7.5 were treated in 35µl of Refraction Index Matching (RIM),  
523 as described in <sup>51</sup>. For proximal-distal oriented whole-mount, embryos were embedded in  
524 warm 0.5% low melting agarose dissolved in PBS 1X, in a 15-well ibidi. Sections and whole-  
525 mount embryos were imaged on a Zeiss LSM 780 microscope equipped with Plan-Apochromat  
526 25×/0.8, C Achromplan 32×/0.85 and LD C Apochromat 40×/1.1 objectives.

527 **Image analysis**

528 Images were processed using Arivis Vision4D v2.12.3 (Arivis, Germany), image j Fiji and Icy  
529 software (<http://icy.bioimageanalysis.org>).

530

531 Mitotic index and non-apical mitotic index statistical analysis were performed as described in  
532 <sup>12</sup>. Mitosis was considered “non-apical” when happening at least 10  $\mu\text{m}$  away from the apical  
533 pole and was not in the first pseudo-layer of nuclei lining the apical pole. Only cells still  
534 attached to the apical pole, and that did not cross the limit of basement membrane  
535 discontinuity, were considered in the measurements.

536

537 For transverse sections, anterior-posterior boundary was placed at mid-distance between the  
538 anterior and posterior poles. The PS region was defined by the area where the basement  
539 membrane was discontinuous, and the posterior region quantification excluded counts from  
540 the PS region. A cell was counted as being part of the PS region if at least 50% of its cell body  
541 was within the area where the basement membrane was non-ambiguously degraded, and if  
542 the cell retained its attachment to the apical pole (cell contours were defined by F-actin  
543 detection using Phalloidin). Phospho-histone H3 labelling was used to count cell in mitosis,  
544 normalised by the number of nuclei (DAPI staining) in each region. Mitosis was considered  
545 “non-apical” when happening at least 10  $\mu\text{m}$  away from the apical pole and/or not in the first  
546 pseudo-layer of nuclei lining the apical pole. Non-apical mitosis ratio was calculated by  
547 dividing the number of non-apical Phh3+ nuclei by the total number of Phh3+ nuclei in a  
548 subregion of the epiblast. The percentage of basement degradation was calculated using  
549 Collagen IV labelling, through dividing the length of the area where the membrane was  
550 degraded by the total length of the basement membrane around the epiblast and conversion  
551 to percentage. Nuclei size ratio was calculated using Lamin B1 and DAPI labelling, by diving  
552 nuclei short axis by their long axis.

553

554 For each population, normality was assessed using a Shapiro–Wilk test. According to the  
555 results of the precedent test, samples were compared using a non-parametric Mann–Whitney  
556 test or an unpaired t-test. For cross statistics, either anova or Kruskal-Wallis followed by Dunn  
557 post tests were performed. Ns: non-significant, \*P-value  $\leq 0.05$ , \*\*P-value  $\leq 0.01$  and \*\*\*P-

558 value  $\leq 0.001$ . Graphs and statistics were obtained using Spyder environment (3.9) python  
559 code and prism 5.0.

560

### 561 **In-Silico modeling**

562 The complete details of the model are described in <sup>20</sup>. Parameters used to adjust the in silico  
563 tissue to the epiblast configuration are mentioned in the Results section.

564

565 **ACKNOWLEDGMENTS**

566 We wish to thank the Université Libre de Bruxelles/Erasme animal facility. We gratefully  
567 acknowledge the Université Libre de Bruxelles light microscopy (LiMiF) core facility (M.  
568 Martens and J-M. Vanderwinden) for help with confocal imaging.

569

570 E.D.G. received a FRIA fellowship of the Fonds de la Recherche Scientifique (FNRS) and a grant  
571 from the “Fondation Alice and David Van Buuren” and “Fondation Jaumotte-Demoulin”. I.M.  
572 is a FNRS senior research associate. E.T. is a research director at the French National Research  
573 Center (CNRS).

574

575 **DECLARATION OF INTERESTS**

576 The authors declare no conflict of interests.

577

578 **FIGURE LEGENDS:**

579 **Figure 1 : Calibration of pharmacological screening and in silico modeling.** (A) Graphic  
580 representation of a transverse section from a E6.5 embryo. The epiblast is divided in three  
581 regions: anterior (pink), posterior (green) and the PS (PS, blue). Anterior and posterior regions  
582 are defined by dividing the epiblast in halves. The PS region is the subsection of the posterior  
583 region where the basement membrane (BM) is discontinuous (Collagen IV, yellow). Mesoderm  
584 cells that exited the epiblast are in purple. The black double head arrow represents the  
585 distance in  $\mu\text{m}$  between the apical and the basal surface. (B) Graphic representation of a  
586 transverse section from a E6.5 embryo. Nuclei are in purple, apical mitosis in pink and non-  
587 apical mitosis in green. A mitosis is considered non-apical if it occurs at least  $10\mu\text{m}$  away from  
588 the apical surface (lumen), in a cell that retains apical and basal contact. (C) Diagram  
589 representing simulated cells controlled by various springs: apical cell adhesions (apical-to-  
590 apical spring), and the cytoplasmic cytoskeleton with basal cell-matrix adhesion (nucleus-to-  
591 basal spring and apical-to-Nucleus spring). Cell-matrix adhesions are modeled by the  
592 attachment of the nucleus-to-basal spring to the basal line. Nuclei are modeled with two  
593 layers. The soft layer can adjust to the environment to model pseudo-stratified morphology,  
594 the hard core cannot be deformed and increases during mitosis (D) Representation of a  
595 simulation setup ( $t=0\text{h}$ ) for the in silico model adapted to the epiblast dynamics, with 19 PS  
596 (purple nuclei) cells and 40 epiblast cells (green nuclei). The red line represents the apical  
597 surface, and the black line the basal surface.

598

599 **Figure 2 : Preventing basement membrane degradation does not affect mitosis position.** (A)  
600 Z-projection of transverse sections from E6 embryos cultured for 6 hours with control vehicle  
601 or MMPs inhibitors, stained for nuclei (DAPI, cyan), basement membrane (collagen IV, yellow),  
602 mitosis (Phospho-histone H3 (Phh3), magenta) and F-actin (phalloidin, grey). Arrow heads  
603 indicates instances of non-apical mitosis. Scale bars:  $25\mu\text{m}$ . (B) Violin plots representing the  
604 percentage of basement membrane degradation in embryos cultured with control vehicle or  
605 MMPs inhibitors. Inner dotted lines indicate third quartile, median, and first quartile. \*\*\*: P-  
606 value  $\leq 0.001$ . Normality was assessed using a Shapiro–Wilk test followed by Mann Whitney  
607 test. Controls:  $n= 14$  slides from 8 embryos; MMPs inhibitors:  $n= 21$  slides from 7 embryos. (C-  
608 D) Split violin plots representing the mitotic index (C) and non-apical mitotic index (D), in  
609 anterior, posterior and PS regions embryos cultured with control vehicle or MMPs inhibitors.

610 Ns: nonsignificant. Normality was assessed using a Shapiro–Wilk test followed by Mann-  
611 Whitney or t-test. Controls:  $n= 14$  slides from 8 embryos, anterior: 694 nuclei, posterior: 436  
612 nuclei, PS: 332 nuclei. MMPs inhibitors:  $n= 21$  slides from 7 embryos, anterior: 846 nuclei,  
613 posterior: 660 nuclei, PS: 441 nuclei. (E) Z-projection of transverse sections from E6 embryos  
614 cultured for 8 hours with control vehicle or MMPs inhibitors, stained for basement membrane  
615 (collagen IV, yellow) and F-actin (phalloidin, grey). White squares show regions of zooms in  
616 the PS regions. Scale bars: 25  $\mu\text{m}$  and 10  $\mu\text{m}$  (zooms). (F) Graph from in silico simulations  
617 representing the percentage of non-apical mitosis depending on aN strength in epiblast cells  
618 (6h cell cycle) and PS cells (3h cell cycle). 200 simulations with 30 proliferating cells. (G) Table  
619 presenting the simulated parameters set for epiblast and PS cells in control conditions in the  
620 in silico epiblast model. Event B designate the detachment of cells' basal point from the basal  
621 line. (H) Bar plot representing the ratio of non-apical mitosis (%), in the region of the epiblast  
622 and PS in simulations ran with control settings or in situations where PS cells do not undergo  
623 event **B**. 200 simulations with 20 epiblast cells and 19 PS cells. (I) Table recapitulating the  
624 settings of epiblast and PS cells in control and test simulations. For the simulation, only the  
625 modified parameters are indicated. A-P: Anterior – Posterior; Ap-Bas: Apical – Basal; PS: PS;  
626 CC: cell cycle; aN: apical-Nuclei spring, bN: basal-Nuclei spring; aa: apical adhesion spring.

627

628 **Figure 3: Actomyosin relaxation at the PS triggers the disharmonization of cell cycle and pre-**  
629 **mitotic rapid apical movements.** (A) Graphic representation of a nucleus. Nuclei size ratio is  
630 calculated by dividing the short axis (SA) by the long axis (LA) of each nucleus. A ratio close to  
631 0 indicates an elongated shape, while a ratio close to one indicates a round shape. (B-B') Z-  
632 projection of a transverse section from a E7 embryo, stained for Lamin B1 (green) (B). Zoom  
633 on nuclei from the anterior, posterior and PS regions (B'). Scale bars: 25 $\mu\text{m}$  (D) and 10 $\mu\text{m}$  (B').  
634 (C-C'') Violin plots representing nuclei size ratio at the anterior, posterior and PS region at  
635 E6.25 (C), E6.5 (C') and E7 (C''). Inner dotted lines indicate third quartile, median, and first  
636 quartile. Normality was assessed using a Shapiro–Wilk test followed by a Kruskal-Wallis test  
637 with Dunnet post hoc. ns: non-significant, \*: P-value $\leq$ 0.05, \*\*: P-value $\leq$ 0.01 and \*\*\*: P-  
638 value $\leq$ 0.001. E6.25:  $n= 4$  embryos, anterior: 20 nuclei, posterior: 20 nuclei, PS: 20 nuclei. E6.5:  
639  $n= 4$  embryos, anterior: 20 nuclei, posterior: 20 nuclei, PS: 20 nuclei. E7:  $n= 4$  embryos,  
640 anterior: 20 nuclei, posterior: 20 nuclei, PS: 21 nuclei. (D) Z-projection of transverse sections  
641 from E6.5 embryos cultured for 2 hours with control vehicle or ROCK inhibitor at 40 $\mu\text{M}$ ,

642 stained for nuclei (DAPI, cyan), basement membrane (collagen IV, yellow), mitosis (Phh3,  
643 magenta) and F-actin (phalloidin, grey). Arrow heads indicates instances of non-apical  
644 mitoses. Scale bars: 25 $\mu$ m. (E-F) Split violin plots representing the mitotic index (E) and non-  
645 apical mitotic index (F), in anterior, posterior, and PS regions in embryos cultured with control  
646 vehicle or 40 $\mu$ M ROCK inhibitor. Inner dotted lines indicate third quartile, median, and first  
647 quartile. Ns: nonsignificant, \*: P-value $\leq$ 0.05. Normality was assessed using a Shapiro–Wilk test  
648 followed by Mann-Whitney or t-test. Control:  $n$ = 26 slides from 12 embryos, anterior: 1048  
649 nuclei, posterior: 663 nuclei, PS: 348 nuclei. ROCK inhibitor:  $n$ = 14 slides from 7 embryos,  
650 anterior: 738 nuclei, posterior: 531 nuclei, PS: 205 nuclei. (G) Violin plots representing nuclei  
651 size ratio in anterior, posterior, and PS regions, in embryos cultured with control vehicle or  
652 40 $\mu$ M ROCK inhibitor. Inner dotted lines indicate third quartile, median, and first quartile. Ns:  
653 non-significant, \*: P-value $\leq$ 0.05, \*\*\*: P-value $\leq$ 0.001. Normality was assessed using a Shapiro–  
654 Wilk test followed by Mann-Whitney or t-test. Control:  $n$ = 11 embryos, anterior: 37 nuclei,  
655 posterior: 37 nuclei, PS: 37 nuclei. 40 $\mu$ M ROCK inhibitor:  $n$ = 5 embryos, anterior: 19 nuclei,  
656 posterior: 20 nuclei, PS: 20 nuclei. (H) Bar plot representing the percentage of non-apical  
657 mitosis in the region of the epiblast and PS in various simulations: control, relaxation of all  
658 springs, relaxation of INM (aN/bN) springs, and relaxation of apical adhesion springs. 200  
659 simulations with 20 epiblast cells and 19 PS cells. (I) Table recapitulating the settings of  
660 epiblast and PS cells in control and test simulations. For the simulation, only the modified  
661 parameters are indicated. A-P: Anterior – Posterior; Ap-Bas: Apical – Basal; PS: primitive  
662 streak; INM: interkinetic nuclei migration; CC: cell cycle; **B**: detachment of basal adhesions  
663 from the basal line; aN: apical-Nuclei spring, bN: basal-Nuclei spring; aa: apical adhesion  
664 spring.

665

666 **Figure 4 : Cell cycle regulation at the PS is less stringent than in the rest of the epiblast, which**  
667 **triggers the appearance of non-apical mitoses.** (A) Z-projections of transverse sections from  
668 E6.5 embryos cultured for 2 hours with control vehicle or 175 $\mu$ M of CDK1 inhibitor (R03366),  
669 stained for nuclei (DAPI, cyan), basement membrane (collagen IV, yellow), mitosis (phh3,  
670 magenta) and F-actin (phalloidin, grey). Scale bars: 25 $\mu$ m. (B-C) Violin plots representing the  
671 mitotic index (B) and non-apical mitotic index (C) in anterior, posterior, and PS regions in  
672 embryos cultured with control vehicle or 175 $\mu$ M CDK1 inhibitor. Inner dotted lines indicate  
673 third quartile, median, and first quartile. \*\*\*: P-value $\leq$ 0.001. Normality was assessed using a



674 Shapiro–Wilk test followed by Mann-Whitney test. Control:  $n= 24$  slides from 8 embryos,  
675 anterior: 923 nuclei, posterior: 595 nuclei, PS: 312 nuclei. 175 $\mu$ M CDK1 inhibitor:  $n= 11$  slides  
676 from 7 embryos, anterior: 414 nuclei, posterior: 329 nuclei, PS: 124 nuclei. (D) Z-projection of  
677 transverse sections from E6.5 embryos cultured for 2 hours in vehicle (Control) or with 20 $\mu$ M,  
678 40 $\mu$ M or 80 $\mu$ M of Wee1 inhibitor, stained for nuclei (DAPI, cyan), basement membrane  
679 (collagen IV, yellow), mitosis (phh3, magenta) and F-actin (phalloidin, grey). Arrow heads  
680 indicates instances of non-apical mitoses. Scale bars: 25 $\mu$ m. (E-F) Violin plots representing the  
681 mitotic index (E) and non-apical mitotic index (F), in anterior, posterior, and PS regions of  
682 embryos cultured with control vehicle or 5 $\mu$ M, 10 $\mu$ M, 20 $\mu$ M, 40 $\mu$ M or 80 $\mu$ M of Wee1 inhibitor  
683 for 2 hours. Inner dotted lines indicate third quartile, median, and first quartile. ns:  
684 nonsignificant, \*: P-value $\leq$ 0.05, \*\*: P-value $\leq$ 0.01 and \*\*\*: P-value $\leq$ 0.001. Normality was  
685 assessed using a Shapiro–Wilk test followed by Mann-Whitney or t-test. Control:  $n= 27$  slides  
686 from 13 embryos, anterior: 1111 nuclei, posterior: 705 nuclei, PS: 362 nuclei. 5 $\mu$ M Wee1  
687 inhibitor:  $n= 12$  slides from 5 embryos, anterior: 501 nuclei, posterior: 298 nuclei, PS: 166  
688 nuclei. 10 $\mu$ M Wee1 inhibitor:  $n= 16$  slides from 10 embryos, anterior: 647 nuclei, posterior:  
689 412 nuclei, PS: 324 nuclei. 20 $\mu$ M Wee1 inhibitor:  $n= 21$  slides from 9 embryos, anterior: 1236  
690 nuclei, posterior: 716 nuclei, PS: 555 nuclei. 40 $\mu$ M Wee1 inhibitor:  $n= 9$  slides from 4 embryos,  
691 anterior: 409 nuclei, posterior: 262 nuclei, PS: 226 nuclei. 80 $\mu$ M Wee1 inhibitor:  $n= 12$  slides  
692 from 6 embryos, anterior: 575 nuclei, posterior: 330 nuclei, PS: 297 nuclei. (G) Bar plot  
693 representing the percentage of non-apical mitosis in the region of the epiblast and PS in  
694 various simulation: control, reduction of the total cell cycle duration (3h), reduction of G2 and  
695 M phase duration (15 minutes) and reduction of both the total duration of the cell cycle (3h)  
696 and of G2 and M duration (15 minutes). 200 simulations with 20 epiblast cells and 19 PS cells.  
697 (H) Table recapitulating the settings of epiblast and PS cells in control and test simulations. For  
698 the simulation, only the modified parameters are indicated. A-P: Anterior – Posterior; Ap-Bas:  
699 Apical – Basal; PS: primitive streak; CC: cell cycle; **B**: detachment of basal adhesions from the  
700 basal line; aN: apical-Nuclei spring, bN: basal-Nuclei spring; aa: apical adhesion spring.

701

702 **Figure 5: Non-apical mitoses are positively correlated with basal extrusion at the primitive**  
703 **streak.** (A) Bar plot of the mean percentage of nuclei basal positioning in tested scenarios for  
704 epiblast and PS cells. (B) Legend for tested scenarios. Squares correspond to the region of the  
705 epiblast and circles the PS. (C) Scatter plot of the percentage of non-apical mitoses and mean

706 rate of nuclei basal positioning in tested scenarios for the epiblast and PS. (D) Scatterplot of  
707 the mean rate of basal extrusion and basal positioning in tested scenarios for the epiblast and  
708 the PS. (E) Scatter plot of the mean rate of basal extrusion and the percentage of non-apical  
709 mitosis in tested scenarios for the epiblast and PS.

710

711 **Figure 6: Dynamic changes observed at the PS are independent from epithelial-**  
712 **mesenchymal transition progress and mesoderm specification *in vivo*.** (A-B) Z-projections of  
713 transverse sections from E6.5 embryos cultured for 2 hours with control vehicle, 40 $\mu$ M of  
714 ROCK inhibitor, 20 $\mu$ M Wee1 inhibitor or 175 $\mu$ M CDK1 inhibitor, stained for the EMT marker  
715 Snail (yellow) and F-actin (phalloidin, grey) (A) or E-cadherin (cyan) and N-cadherin (magenta)  
716 (B). Scale bars: 25 $\mu$ m. (D-D'') Violin plots representing the percentage of basement membrane  
717 degradation in embryos cultured with control vehicle, 40 $\mu$ M ROCK inhibitor (D), 20 $\mu$ M Wee1  
718 inhibitor (D'), 175 $\mu$ M CDK1 inhibitor (D''). Control:  $n= 27$  slides from 13 embryos; 40 $\mu$ M ROCK  
719 inhibitor:  $n= 14$  slides from 7 embryos; 20 $\mu$ M Wee1 inhibitor:  $n= 21$  slides from 9 embryos;  
720 175 $\mu$ M CDK1 inhibitor:  $n= 11$  slides from 7 embryos. (E) In situ hybridization for Brachyury (T)  
721 (top), and Eomesodermin (bottom) on E7.5 WT, RhoA $\Delta$ epiblast, Ect2 $\Delta$ epiblast embryos. Scale  
722 bars: 100  $\mu$ m. Brachyury (T): RhoA $\Delta$ epiblast:  $n=2$ , ECT2 $\Delta$ epiblast:  $n=4$ , Eomesodermin:  
723 RhoA $\Delta$ epiblast:  $n=5$ ; Ect2 $\Delta$ epiblast:  $n=5$ .

724

725 **Figure 7: Occurrence of non-apical mitoses at the primitive streak induced by relaxation of**  
726 **actomyosin and acceleration of the cell cycle contributes to cell extrusion during mouse**  
727 **gastrulation.** Diagram representing the state of the cell cycle, actomyosin contractility, and  
728 basal attachment in the region of the epiblast and the primitive streak during gastrulation EMT  
729 in the mouse embryo. At the primitive streak, faster cell cycle and shortened G2 duration,  
730 combined with weak cytoplasmic actomyosin contractility and basal detachment of cells, leads  
731 to a high frequency of non-apical mitosis that contribute to basal extrusion.

732

733 **Supplementary 1:** (A-C) Bar plots representing non-apical mitosis ratio in of embryos cultured  
734 in vehicle or for 6 hours with MMPs inhibitors (A); for 2 hours with 40 $\mu$ M of ROCK inhibitor  
735 (B); for 2 hours with 5 $\mu$ M, 10 $\mu$ M, 20 $\mu$ M, 40 $\mu$ M, 80 $\mu$ M of Wee1 inhibitor (C), in anterior,  
736 posterior and PS regions. Ns: nonsignificant, \*: P-value $\leq$ 0.05, \*\*: P-value $\leq$ 0.01 and \*\*\*: P-  
737 value $\leq$ 0.001. Shapiro–Wilk test followed by Mann-Whitney or t-test. (A) Control:  $n= 14$  slides

738 from 8 embryos. MMPs inhibitors:  $n= 21$  slides from 7 embryos. (B) Control:  $n= 26$  slides from  
739 12 embryos, ROCK inhibitor:  $n= 14$  slides from 7 embryos. (C) Control:  $n= 27$  slides from 13  
740 embryos,  $5\mu\text{M}$  Wee1 inhibitor:  $n= 12$  slides from 5 embryos,  $10\mu\text{M}$  Wee1 inhibitor:  $n= 16$  slides  
741 from 10 embryos,  $20\mu\text{M}$  Wee1 inhibitor:  $n= 21$  slides from 9 embryos,  $40\mu\text{M}$  Wee1 inhibitor:  
742  $n= 9$  slides from 4 embryos,  $80\mu\text{M}$  Wee1 inhibitor:  $n= 12$  slides from 6 embryos. (D) Brightfield  
743 images of control embryos and embryos cultured with MMPs inhibitors at  $t= 0\text{h}$  and  $t= 6\text{h}$   
744 (top) and  $t=0\text{h}$  and  $t=8\text{h}$  (bottom). Scale bars:  $50\mu\text{m}$ . 6 hours culture: control:  $n= 21$ ; MMPs  
745 inhibitors:  $n= 29$ . 8 hours culture: control:  $n= 10$ , MMPs inhibitors:  $n= 9$ . (E) Brightfield images  
746 of E6.5 embryos vehicle,  $40\mu\text{M}$  ROCK inhibitor,  $20\mu\text{M}$  Wee1 inhibitor, and  $175\mu\text{M}$  CDK1  
747 inhibitor at  $t=0\text{h}$ ,  $t=2\text{h}$  and  $t=16\text{h}$ . Embryos were cultured for two hours with the designated  
748 inhibitors then placed in fresh culture medium and cultured over night for a total of 16 hours  
749 post dissection. Scale bars:  $50\mu\text{m}$ . Control:  $n= 10$ ,  $40\mu\text{M}$  ROCK inhibitor:  $n= 12$ ,  $20\mu\text{M}$  Wee1  
750 inhibitor:  $n= 11$ ,  $175\mu\text{M}$  CDK1 inhibitor:  $n= 10$ . A-P: Anterior – Posterior.

751

752 **Supplementary 2:** (A) Z-projection of transverse sections from E6.5 embryos cultured for 2  
753 hours with control vehicle or ROCK inhibitor (Y27632) at  $400\mu\text{M}$ , stained for nuclei (DAPI,  
754 cyan), basement membrane (collagen IV, yellow), mitosis (phh3, magenta) and F-actin  
755 (phalloidin, grey). Scale bars:  $25\mu\text{m}$ . (C-C) Split violin plots representing the mitotic index (B)  
756 and non-apical mitotic index (F), in anterior, posterior, and PS regions in embryos cultured  
757 with control vehicle or  $400\mu\text{M}$  ROCK inhibitor. Inner dotted lines indicate third quartile,  
758 median, and first quartile. Ns: nonsignificant, \*:  $P\text{-value}\leq 0.05$ , \*\*:  $P\text{-value}\leq 0.01$ . Normality was  
759 assessed using a Shapiro–Wilk test followed by Mann-Whitney or t-test. Control:  $n= 26$  slides  
760 from 12 embryos, anterior: 1048 nuclei, posterior: 663 nuclei, PS: 348 nuclei. ROCK inhibitor:  
761  $n= 11$  slides from 4 embryos, anterior: 620 nuclei, posterior: 439 nuclei, PS: 298 nuclei. (G)  
762 Violin plots representing nuclei size ratio in anterior, posterior, and PS regions, in embryos  
763 cultured with control vehicle or  $400\mu\text{M}$  ROCK inhibitor. Inner dotted lines indicate third  
764 quartile, median, and first quartile. Ns: non-significant, \*\*:  $P\text{-value}\leq 0.01$ , \*\*\*:  $P\text{-value}\leq 0.001$ .  
765 Normality was assessed using a Shapiro–Wilk test followed by Mann-Whitney or t-test.  
766 Control:  $n= 11$  embryos, anterior: 37 nuclei, posterior: 37 nuclei, PS: 37 nuclei.  $400\mu\text{M}$  ROCK  
767 inhibitor:  $n= 4$  embryos, anterior: 15 nuclei, posterior: 15 nuclei, PS: 15 nuclei.

768

769 **Supplementary 3:** (A-B) Brightfield images of E6.5 (A) and E7.5 (B) wild-type (WT) and  
770  $RhoA\Delta^{epiblast}$  embryos. Scale bars: 100 $\mu$ m. (C) Z-projections in sagittal view from whole-mount  
771 E6.5 WT and  $RhoA\Delta^{epiblast}$  embryos expressing membrane GFP in the epiblast (grey), stained  
772 for mitosis (Phh3, magenta). Scale bars: 25  $\mu$ m. (D) Barplot representing the mean number of  
773 mitoses per  $\mu$ m<sup>3</sup> in WT versus  $RhoA\Delta^{epiblast}$  embryos. (E) Projections from selected z-slices of  
774 E6.5 whole-mount WT and  $RhoA\Delta^{epiblast}$  embryos embedded in low melting agarose in a  
775 proximal-distal orientation. Embryos are stained for F-actin (phalloidin, grey), mitosis (Phh3,  
776 magenta), nuclei (DAPI, cyan) and basement membrane (collagen IV, yellow). Scale bars:  
777 25 $\mu$ m. (F) Projections of selected Z slices from E7.5 whole-mount WT and  $RhoA\Delta^{epiblast}$   
778 embryos stained for nuclei (DAPI, blue) and T (magenta). Arrow heads indicates ectopic  
779 lumens. Scale bars: 50 $\mu$ m. (G) 3D projections of E7.5 WT and  $RhoA\Delta^{epiblast}$  whole-mount  
780 embryos stained for F-actin (phalloidin, red), nuclei (DAPI, blue) and T (cyan). Scale bars:  
781 50 $\mu$ m. (H) Brightfield images of E7.5 WT,  $CDK1\Delta^{epiblast}$  and  $ECT2\Delta^{epiblast}$  embryos. Scale bars:  
782 100 $\mu$ m.  $CDK1\Delta^{epiblast}$ :  $n=5$ ,  $ECT2\Delta^{epiblast}$ :  $n=6$ . (I) Z-projections from E6.5 WT,  $CDK1\Delta^{epiblast}$  and  
783  $ECT2\Delta^{epiblast}$  embryos stained for F-actin (phalloidin, grey) and mitosis (phh3, magenta). Scale  
784 bars: 25 $\mu$ m.  $CDK1\Delta^{epiblast}$ :  $n=4$ ,  $ECT2\Delta^{epiblast}$ :  $n=2$ .

785

## 786 Bibliography

- 787 1. Nieto, M., Huang, R. Y., Jackson, R. A. & Thiery, J. P. Review EMT : 2016. *Cell* **166**, 21–45  
788 (2016).
- 789 2. Yang, J. *et al.* Guidelines and definitions for research on epithelial–mesenchymal transition.  
790 *Nat Rev Mol Cell Biol* **21**, 341–352 (2020).
- 791 3. Nahaboo, W. & Migeotte, I. *Cleavage and Gastrulation in the Mouse Embryo. eLs. John Wiley*  
792 *& Son, Ltd:Chichester* (eLs. John Wiley & Son, Ltd:Chichester, 2018).  
793 doi:10.1002/9780470015902.a0001068.pub3.
- 794 4. Williams, M., Burdsal, C., Periasamy, A., Lewandoski, M. & Sutherland, A. Mouse primitive  
795 streak forms in situ by initiation of epithelial to mesenchymal transition without migration of  
796 a cell population. *Developmental dynamics* **241**, 270–283 (2012).
- 797 5. Kyprianou, C. *et al.* Basement membrane remodelling regulates mouse embryogenesis.  
798 *Nature* **582**, 253–258 (2020).
- 799 6. Carver, E. A., Jiang, R., Lan, Y., Oram, K. F. & Gridley, T. The Mouse Snail Gene Encodes a Key  
800 Regulator of the Epithelial-Mesenchymal Transition. *Mol Cell Biol* **21**, 8184–8188 (2001).
- 801 7. Ramkumar, N. *et al.* Crumbs2 Promotes Cell Ingression During the Epithelial-to-Mesenchymal  
802 Transition at Gastrulation. *Nat Cell Biol* **18**, 1281–1291 (2016).

- 803 8. Francou, A., Anderson, K. V & Hadjantonakis, A.-K. A ratchet-like apical constriction drives cell  
804 ingression during the mouse gastrulation EMT. *Elife* **12**, (2023).
- 805 9. Snow, M. H. L. & Tam, P. P. L. Is compensatory growth a complicating factor in mouse  
806 teratology? *Nature* **279**, 555–557 (1979).
- 807 10. Lewis, N. E. & Rossant, J. *Mechanism of Size Regulation in Mouse Embryo Aggregates. J.*  
808 *Embryol exp. Morph* vol. 72 (1982).
- 809 11. Snow, M. H. L. Gastrulation in the mouse: Growth and regionalization of the epiblast.  
810 *Development* **42**, 293–303 (1977).
- 811 12. Mathiah, N. *et al.* Asymmetry in the frequency and position of mitosis in the mouse embryo  
812 epiblast at gastrulation. *EMBO Rep* (2020) doi:10.15252/embr.202050944.
- 813 13. Mohammed, H. *et al.* Single-Cell Landscape of Transcriptional Heterogeneity and Cell Fate  
814 Decisions during Mouse Early Gastrulation. *Cell Rep* **20**, 1215–1228 (2017).
- 815 14. MacAuley, A., Werb, Z. & Mirkes, P. E. Characterization of the unusually rapid cell cycles  
816 during rat gastrulation. *Development* **117**, 873–883 (1993).
- 817 15. Strzyz, P. J., Matejic, M. & Norden, C. Heterogeneity, Cell Biology and Tissue Mechanics of  
818 Pseudostratified Epithelia: Coordination of Cell Divisions and Growth in Tightly Packed  
819 Tissues. in *International Review of Cell and Molecular Biology* vol. 325 89–118 (Elsevier Inc.,  
820 2016).
- 821 16. Ichikawa, T., Nakazato, K., Keller, P. J., Kajiura-Kobayashi, H. & Stelzer, E. H. K. Live Imaging of  
822 Whole Mouse Embryos during Gastrulation: Migration Analyses of Epiblast and Mesodermal  
823 Cells. *PLoS One* **8**, 64506 (2013).
- 824 17. Andrieu, C. *et al.* MMP14 is required for delamination of chick neural crest cells independently  
825 of its catalytic activity. *Development* **147**, dev183954 (2020).
- 826 18. Ahlstrom, J. & Erickson, C. The neural crest epithelial-mesenchymal transition in 4D: a ‘tail’ of  
827 multiple non-obligatory cellular mechanisms. *Development* **136**, 1801–, (2009).
- 828 19. Ferreira, A. M., Despin-Guitard, E., Duarte, F., Degondid, P. & Thevenaud, E. Interkinetic  
829 nuclear movements promote apical expansion in pseudostratified epithelia at the expense of  
830 apicobasal elongation. *PLoS Comput Biol* **15**, e1007171 (2019).
- 831 20. Plunder, S. *et al.* Modelling variability and heterogeneity of EMT scenarios highlights nuclear  
832 positioning and protrusions as main drivers of extrusion. *BioXiv* (2023)  
833 doi:10.1101/2023.11.17.567510.
- 834 21. Kyprianou, C. *et al.* Basement membrane remodelling regulates mouse embryogenesis.  
835 *Nature* (2020) doi:10.1038/s41586-020-2264-2.
- 836 22. Migeotte, I., Grego-bessa, J. & Anderson, K. V. Rac1 mediates morphogenetic responses to  
837 intercellular signals in the gastrulating mouse embryo. *Development* **3020**, 3011–3020 (2011).
- 838 23. Haase, K. *et al.* Extracellular Forces Cause the Nucleus to Deform in a Highly Controlled  
839 Anisotropic Manner. *Nature Publishing Group* (2016) doi:10.1038/srep21300.
- 840 24. Brandt, A. *et al.* Developmental control of nuclear size and shape by kugelkern and kurz kern.  
841 *Current Biology* **16**, 543–552 (2006).

- 842 25. Lee, H. O. & Norden, C. Mechanisms controlling arrangements and movements of nuclei in  
843 pseudostratified epithelia. *Trends Cell Biol* **23**, 141–150 (2013).
- 844 26. Sauer, F. C. The interkinetic migration of embryonic epithelial nuclei. *J. of morphology* **60**,  
845 (1936).
- 846 27. Vergnes, L., Terfy, P., Bergo, M. O., Young, S. G. & Reue, K. *Lamin B1 Is Required for Mouse*  
847 *Development and Nuclear Integrity*. [www.pnas.org/cgi/doi/10.1073/pnas.0401424101](http://www.pnas.org/cgi/doi/10.1073/pnas.0401424101) (2004).
- 848 28. Thorpe, S. D. & Lee, D. A. Dynamic regulation of nuclear architecture and mechanics—a  
849 rheostatic role for the nucleus in tailoring cellular mechanosensitivity. *Nucleus* **8**, 287–300  
850 (2017).
- 851 29. Lamouille, S., Xu, J. & Derynck, R. Molecular mechanisms of epithelial–mesenchymal  
852 transition. *Nat Rev Mol Cell Biol* **15**, 178–196 (2014).
- 853 30. Amano, M. *et al.* Phosphorylation and Activation of Myosin by Rho-associated Kinase (Rho-  
854 kinase)\*. *Journal of Biological Chemistry* **271**, 20246–20249 (1996).
- 855 31. Amin, E. *et al.* Rho-kinase: regulation, (dys)function, and inhibition HHS Public Access. *Biol*  
856 *Chem* **394**, 1399–1410 (2013).
- 857 32. Meyer, E. J., Ikmi, A. & Gibson, M. C. Interkinetic Nuclear Migration Is a Broadly Conserved  
858 Feature of Cell Division in Pseudostratified Epithelia. *Current Biology* **21**, 485–491 (2011).
- 859 33. Lukaszewicz, A. I. & Anderson, D. J. Cyclin D1 promotes neurogenesis in the developing spinal  
860 cord in a cell cycle-independent manner. **108**, 11632–11637 (2011).
- 861 34. Strzyz, P. J., Lee, H. O., Leung, L. C. & Norden, C. Interkinetic Nuclear Migration Is Centrosome  
862 Independent and Ensures Apical Cell Division to Maintain Tissue Integrity. *Dev Cell* **32**, 203–  
863 219 (2015).
- 864 35. Hashimoto, O. *et al.* Cell cycle regulation by the Wee1 Inhibitor PD0166285, Pyrido [2,3-d]  
865 pyrimidine, in the B16 mouse melanoma cell line. *BMC Cancer* **6**, 292 (2006).
- 866 36. Rose, J. T. *et al.* Inhibition of the RUNX1-CBF $\beta$  transcription factor complex compromises  
867 mammary epithelial cell identity: a phenotype potentially stabilized by mitotic gene  
868 bookmarking. *Oncotarget* **11**, 2512–2530 (2020).
- 869 37. Zaidi, S. K., Lian, J. B., Vanwijnen, A. J., Stein, J. L. & Stein, G. S. Mitotic Gene Bookmarking: An  
870 Epigenetic Mechanism for Coordination of Lineage Commitment, Cell Identity and Cell  
871 Growth. *Advances in Experimental Medecine Biology* **292**, (2017).
- 872 38. Jackson, B. *et al.* RhoA is dispensable for skin development, but crucial for contraction and  
873 directed migration of keratinocytes. *MBoC* **22**, (2011).
- 874 39. Cook, D. R. *et al.* The Ect2 Rho Guanine Nucleotide Exchange Factor Is Essential for Early  
875 Mouse Development and Normal Cell Cytokinesis and Migration. *Genes Cancer* **2**, 932 (2011).
- 876 40. Chaffee, B. R. *et al.* Nuclear removal during terminal lens fiber cell differentiation requires  
877 CDK1 activity: appropriating mitosis-related nuclear disassembly. (2014)  
878 doi:10.1242/dev.106005.
- 879 41. Hayashi, S., Lewis, P., Pevny, L. & McMahon, A. P. Efficient gene modulation in mouse epiblast  
880 using a Sox2Cre transgenic mouse strain. *Gene Expression Patterns* **2**, 93–97 (2002).

- 881 42. Saykali, B. *et al.* Distinct mesoderm migration phenotypes in extra-embryonic and embryonic  
882 regions of the early mouse embryo. *Elife* **8**, (2019).
- 883 43. Voiculescu, O. Movements of chick gastrulation. *Curr Top Dev Biol* **136**, 409–428 (2020).
- 884 44. Despin-Guitard, E. & Migeotte, I. Mitosis, a springboard for epithelial-mesenchymal  
885 transition? *Cell Cycle* **20**, 2452–2464 (2021).
- 886 45. Royer, C. *et al.* ASPP2 maintains the integrity of mechanically stressed pseudostratified  
887 epithelia during morphogenesis. *Nat.Com* (2022) doi:10.1038/s41467-022-28590-4.
- 888 46. Omelchenko, T. Cellular protrusions in 3D: Orchestrating early mouse embryogenesis. *Semin*  
889 *Cell Dev Biol* **129**, 63–74 (2022).
- 890 47. Rakeman, A. S. & Anderson, K. V. Axis specification and morphogenesis in the mouse embryo  
891 require Nap1, a regulator of WAVE-mediated actin branching. *Development* **133**, 3075–3083  
892 (2006).
- 893 48. Yen, W. W. *et al.* PTK7 is essential for polarized cell motility and convergent extension during  
894 mouse gastrulation. *Development* **136**, 2039–2048 (2009).
- 895 49. Petridou, N. I. & Heisenberg, C.-P. Tissue rheology in embryonic organization. *EMBO J* **38**,  
896 e102497 (2019).
- 897 50. Muzumdar, M. D., Tasic, B., Miyamichi, K., Li, N. & Luo, L. A global double-fluorescent Cre  
898 reporter mouse. *genesis* **45**, 593–605 (2007).
- 899 51. Despin-Guitard, E. *et al.* Regionally specific levels and patterns of keratin 8 expression in the  
900 mouse embryo visceral endoderm emerge upon anterior-posterior axis determination. *Front*  
901 *Cell Dev Biol* **10**, (2022).
- 902

FIGURE 1:

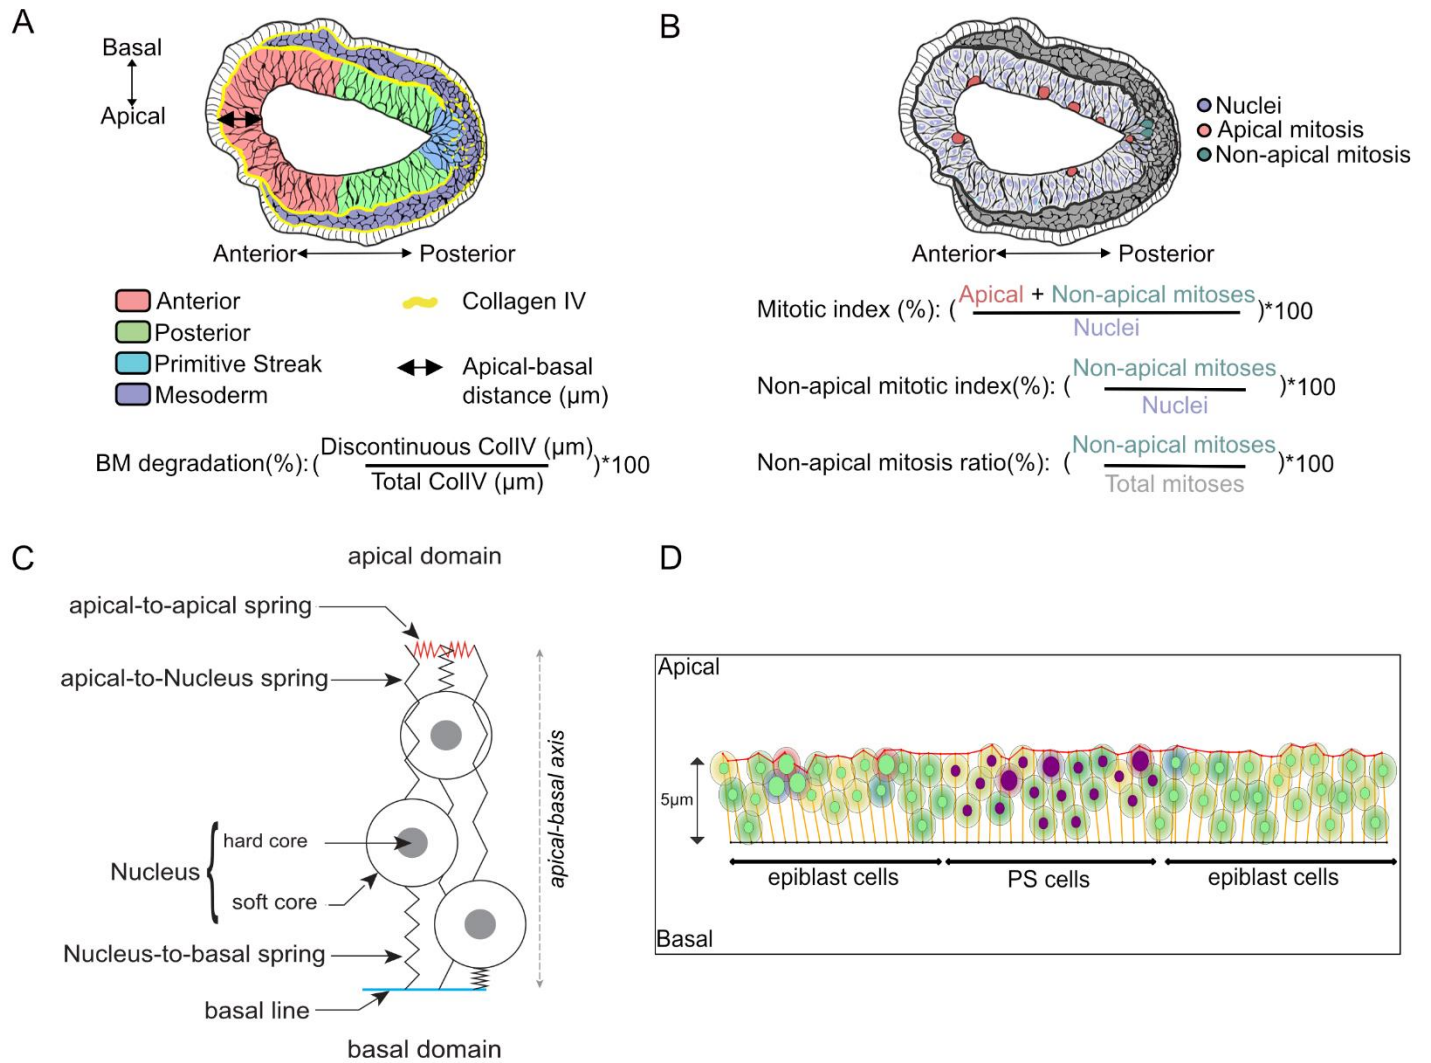



FIGURE 2:

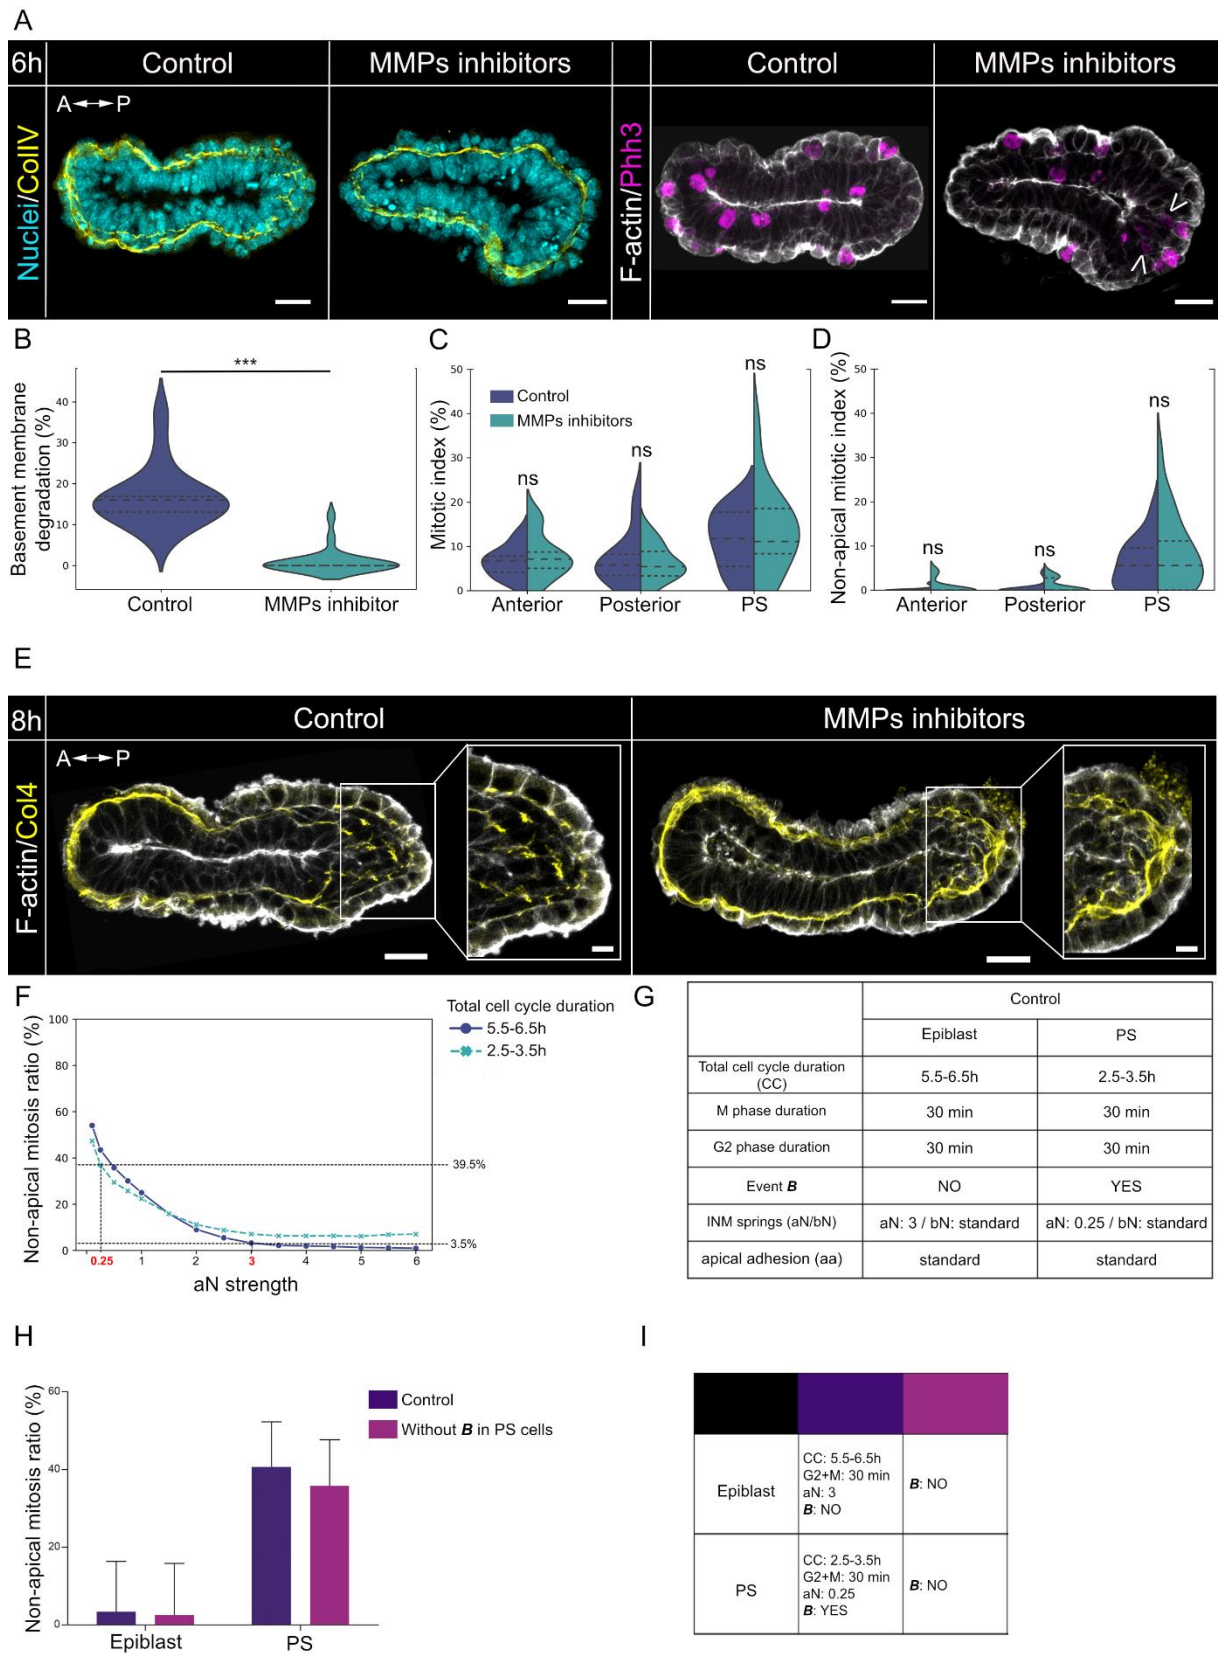

FIGURE 3

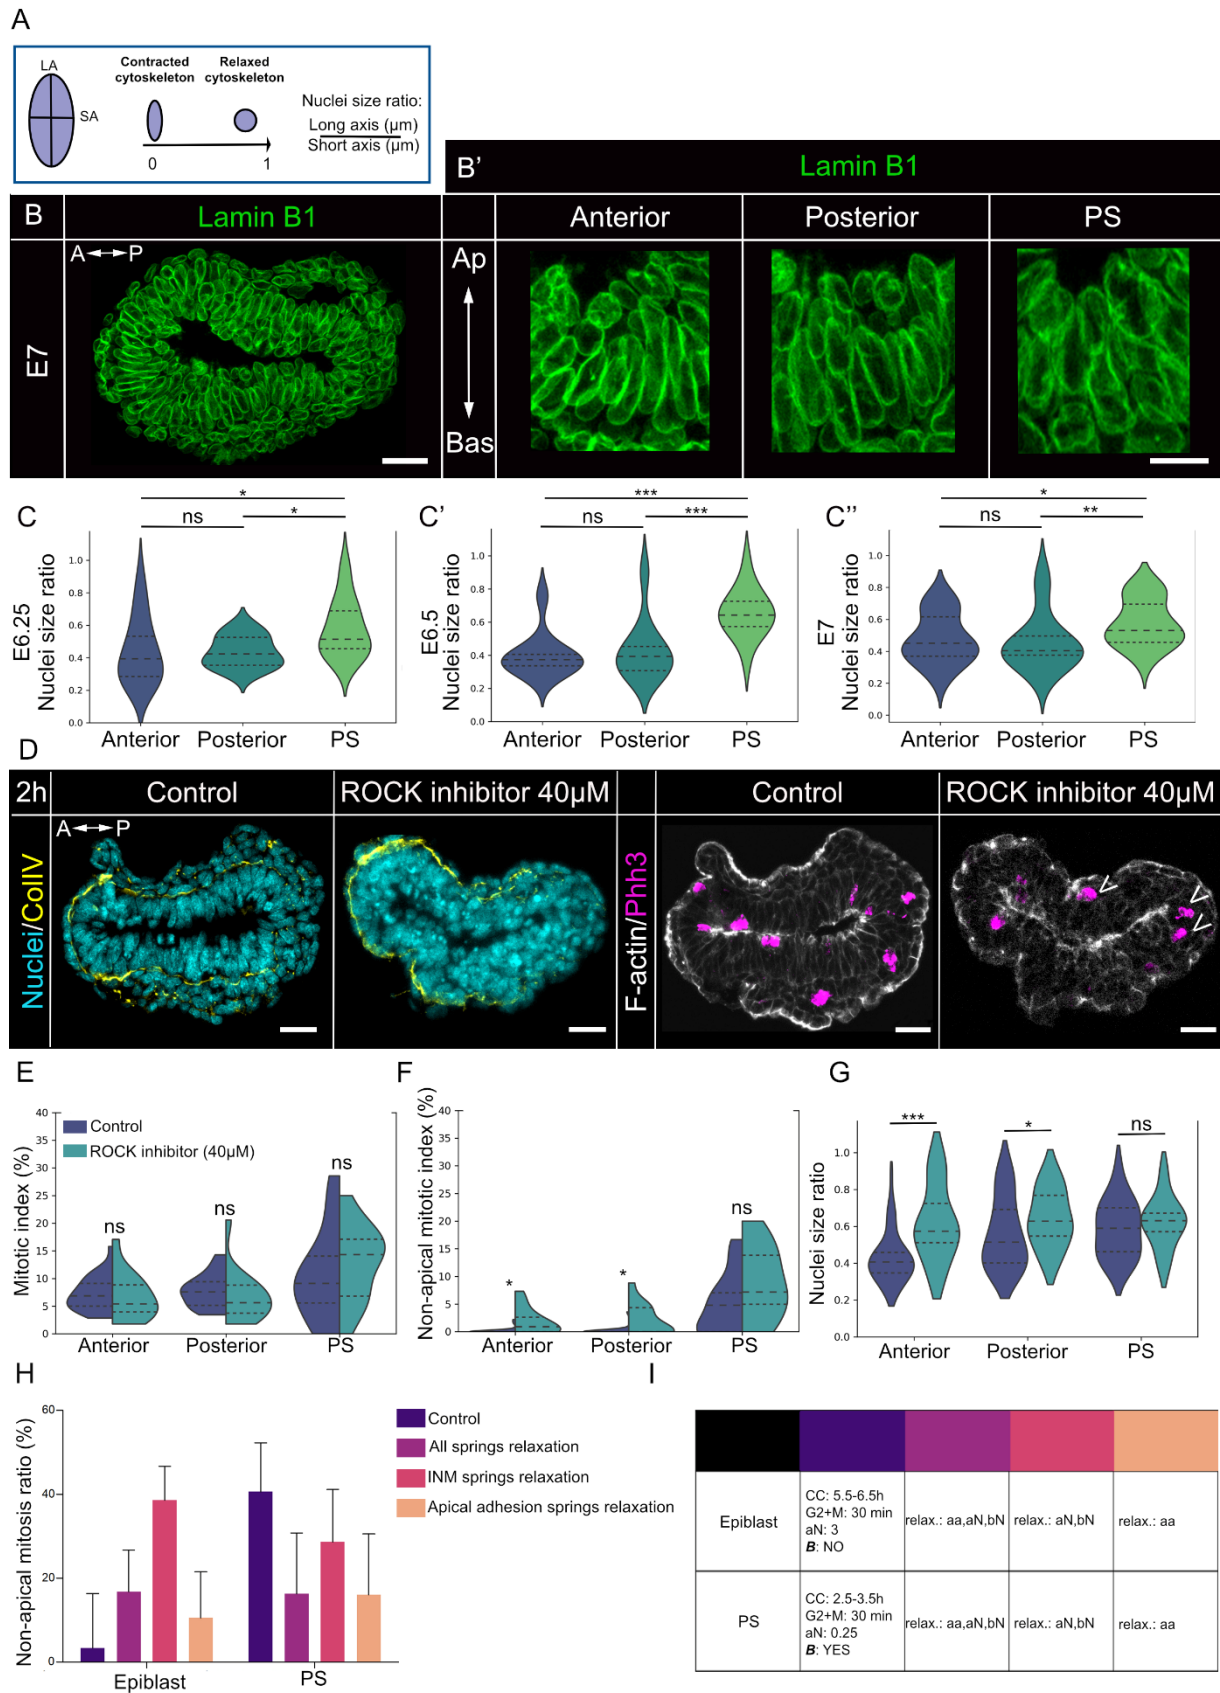

FIGURE 4:

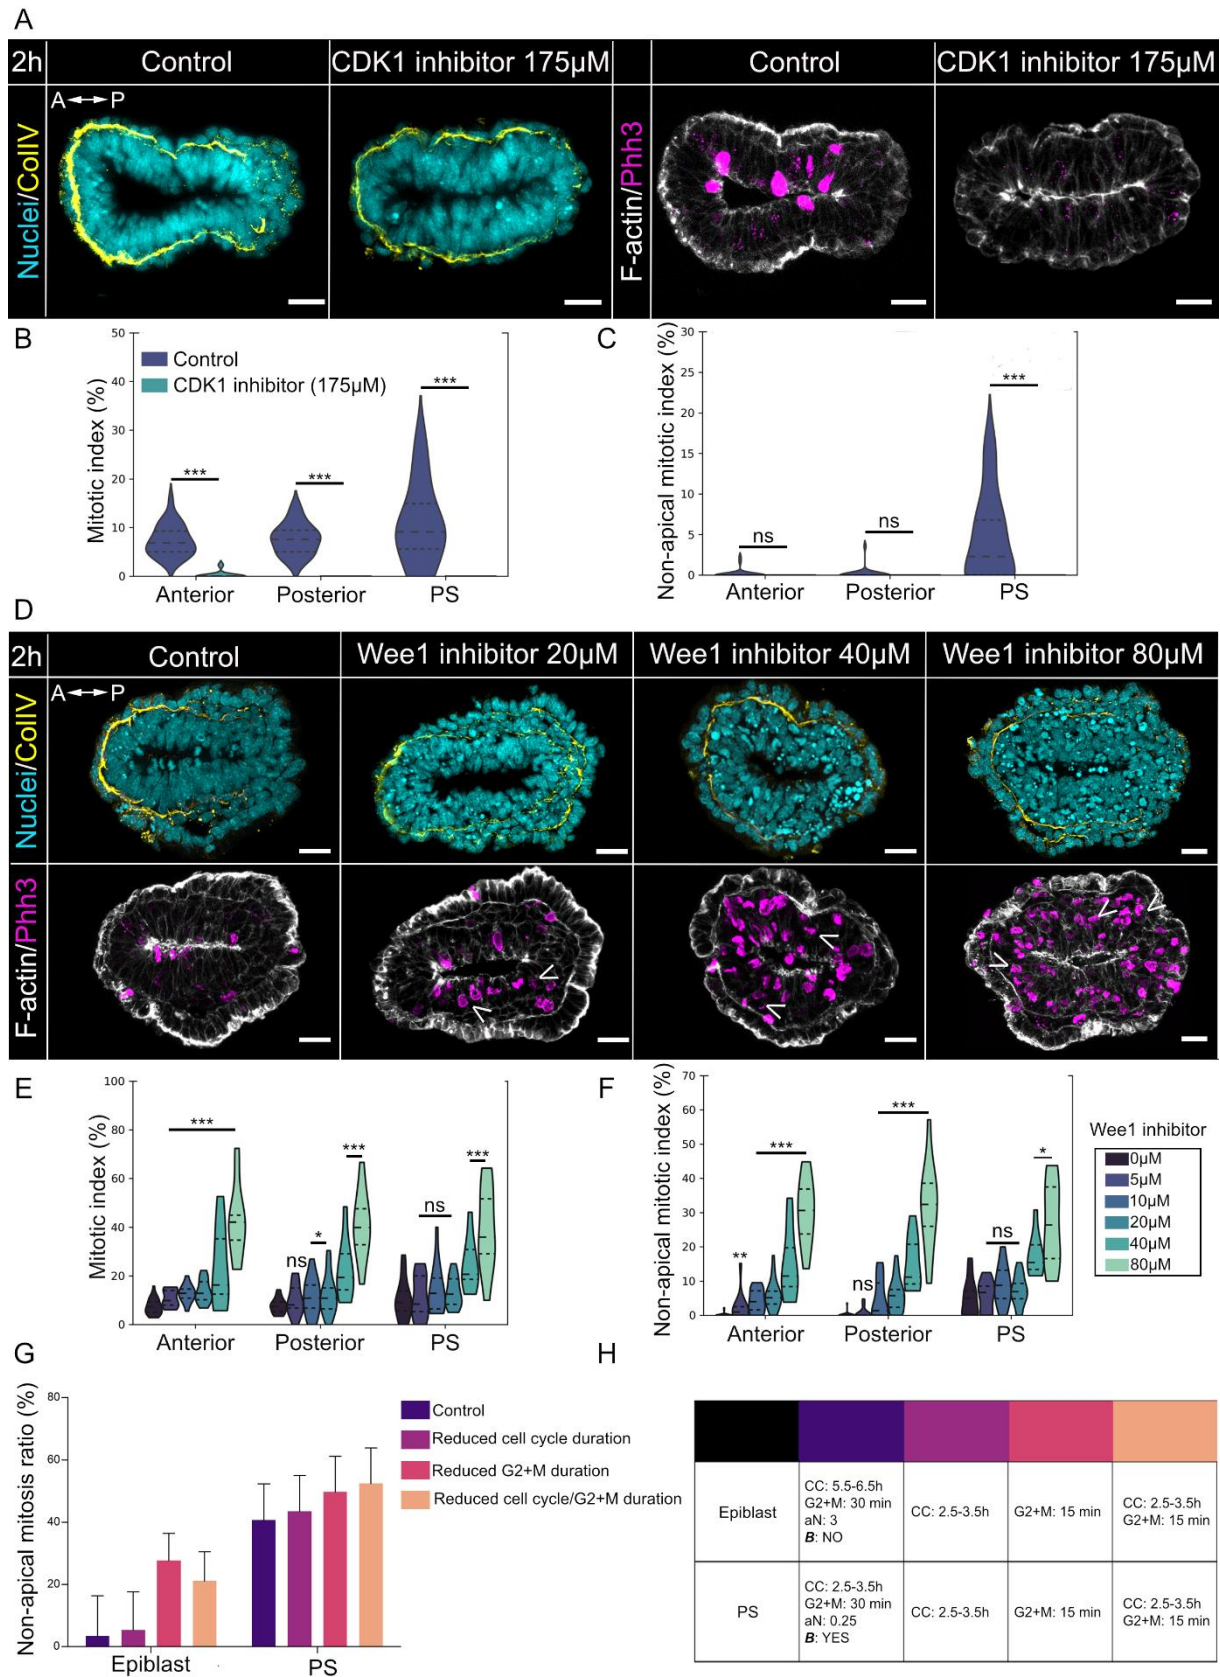

FIGURE 5 :

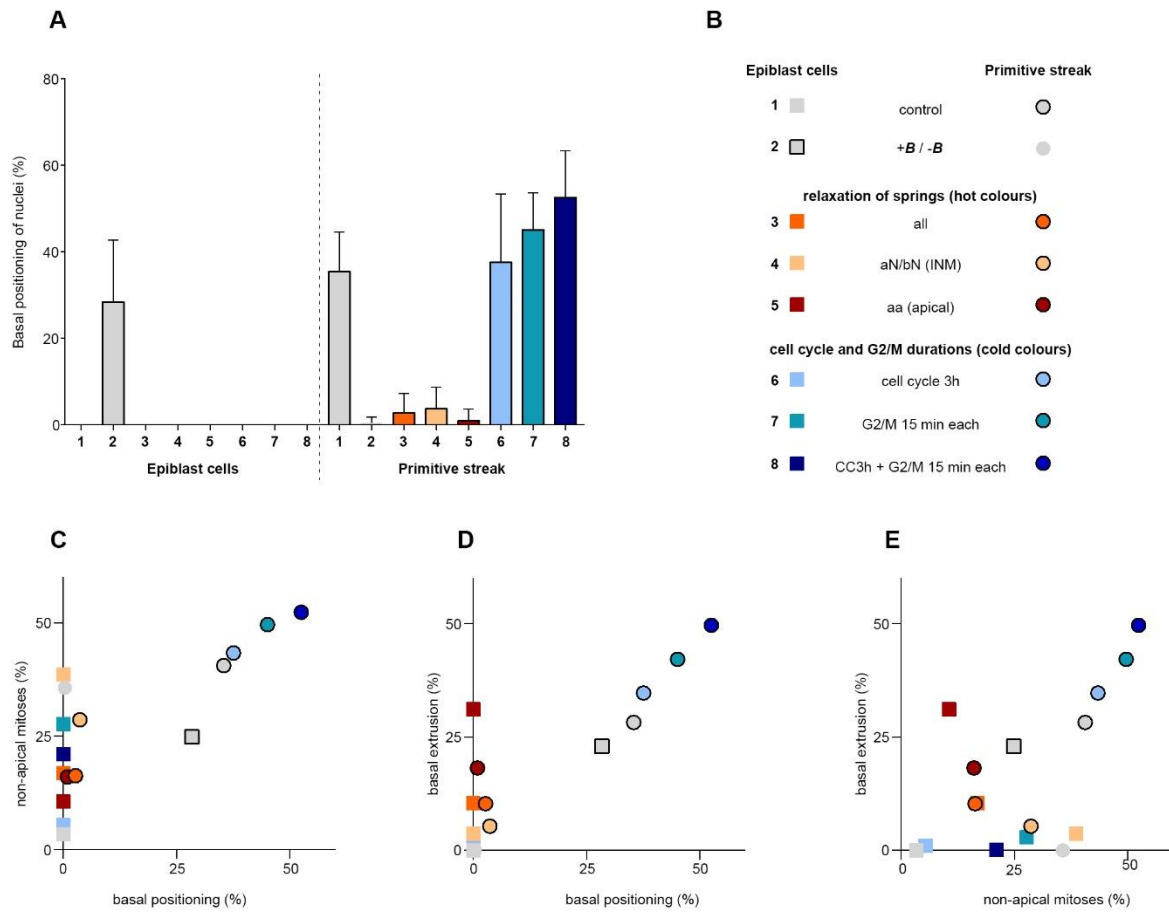

FIGURE 6:

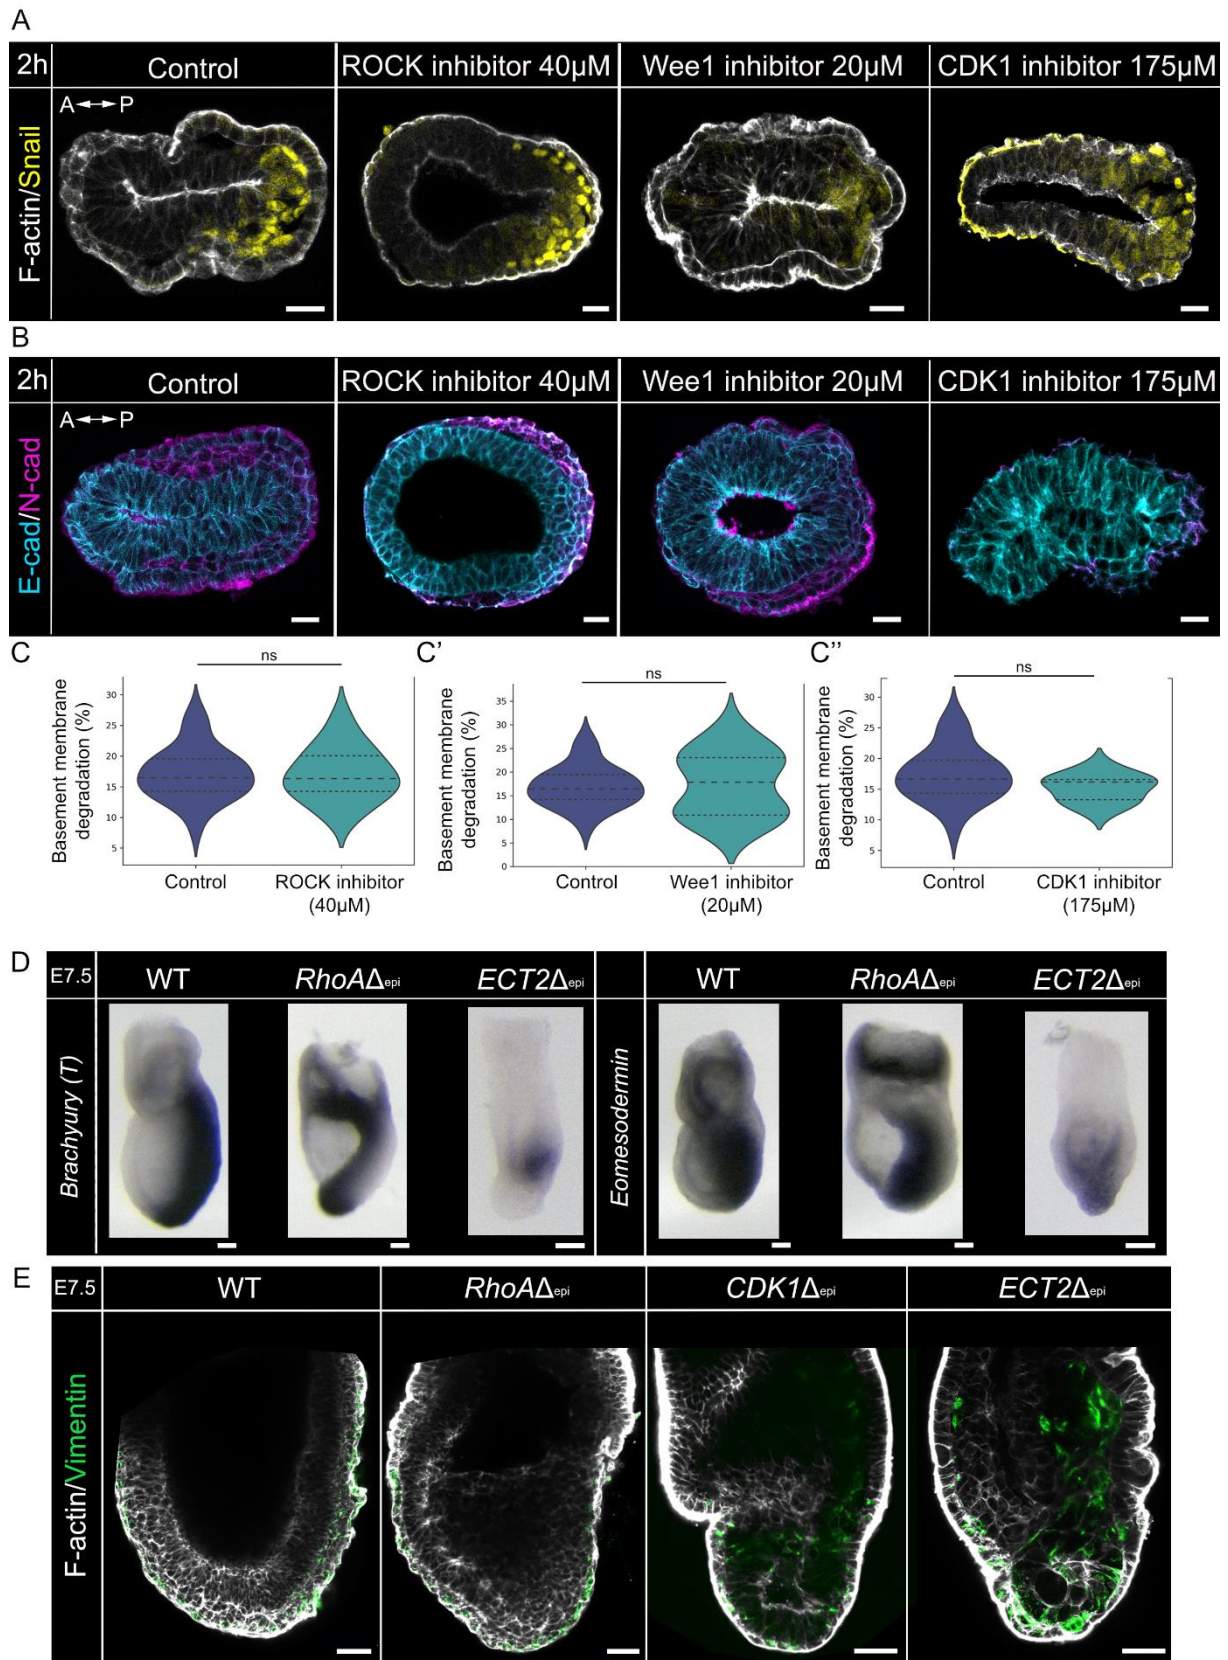

FIGURE 7:

**EPIBLAST**

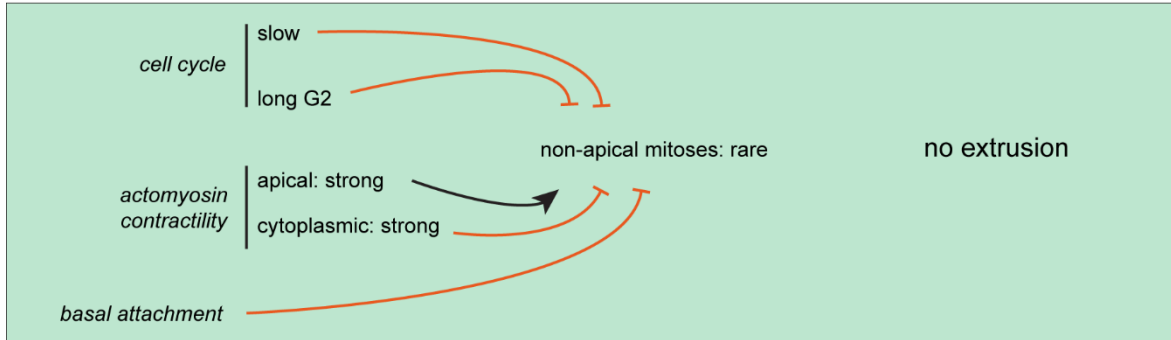

**PRIMITIVE STREAK**

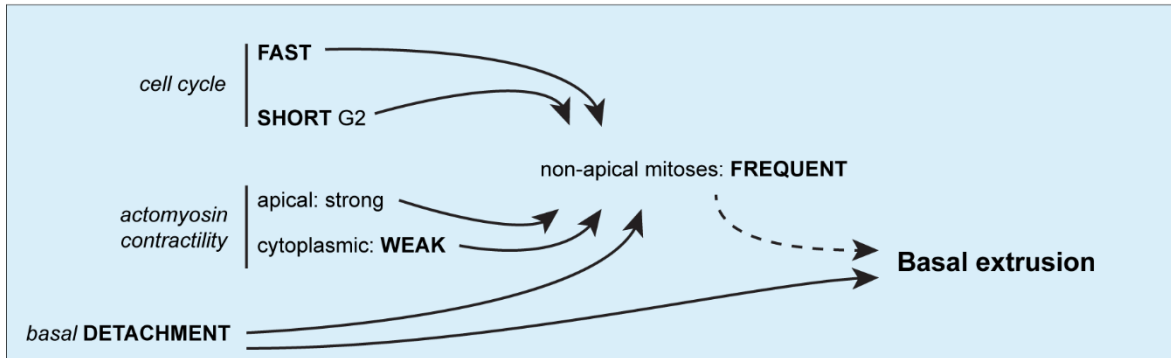

SUPPLEMENTARY 1:

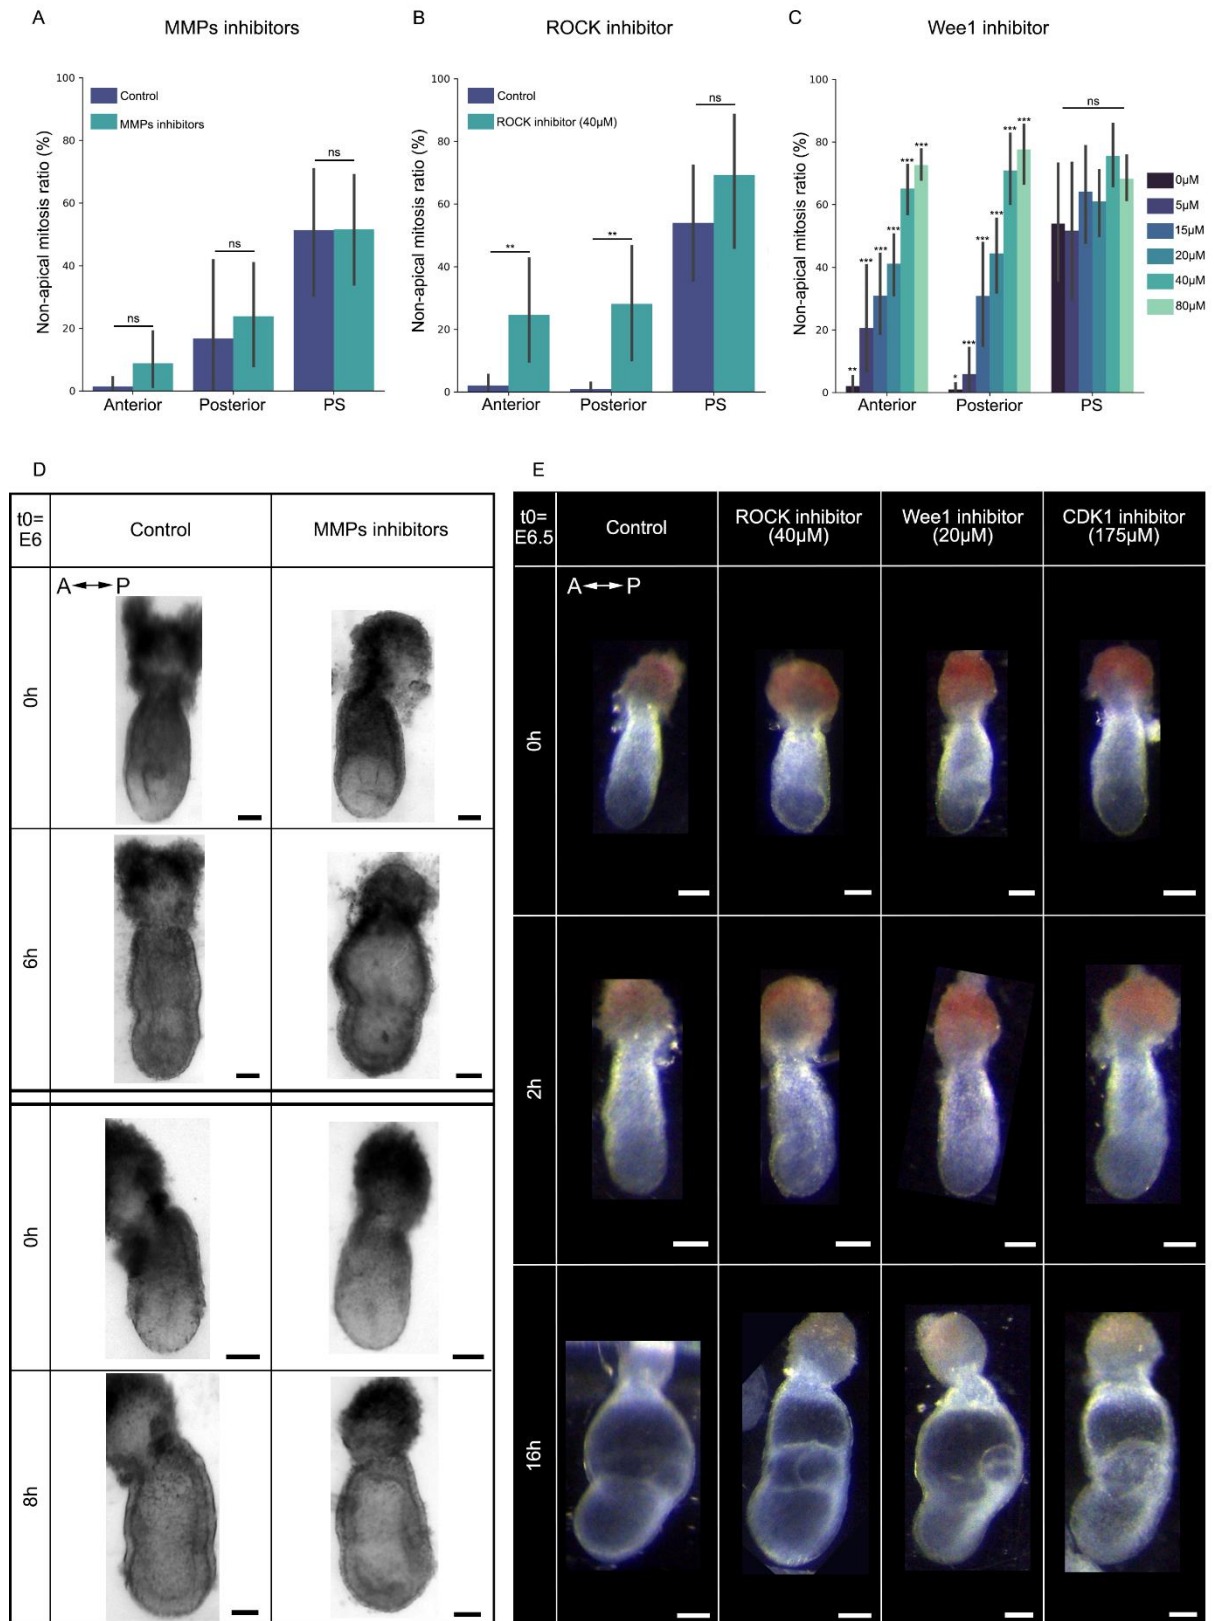

SUPPLEMENTARY 2:

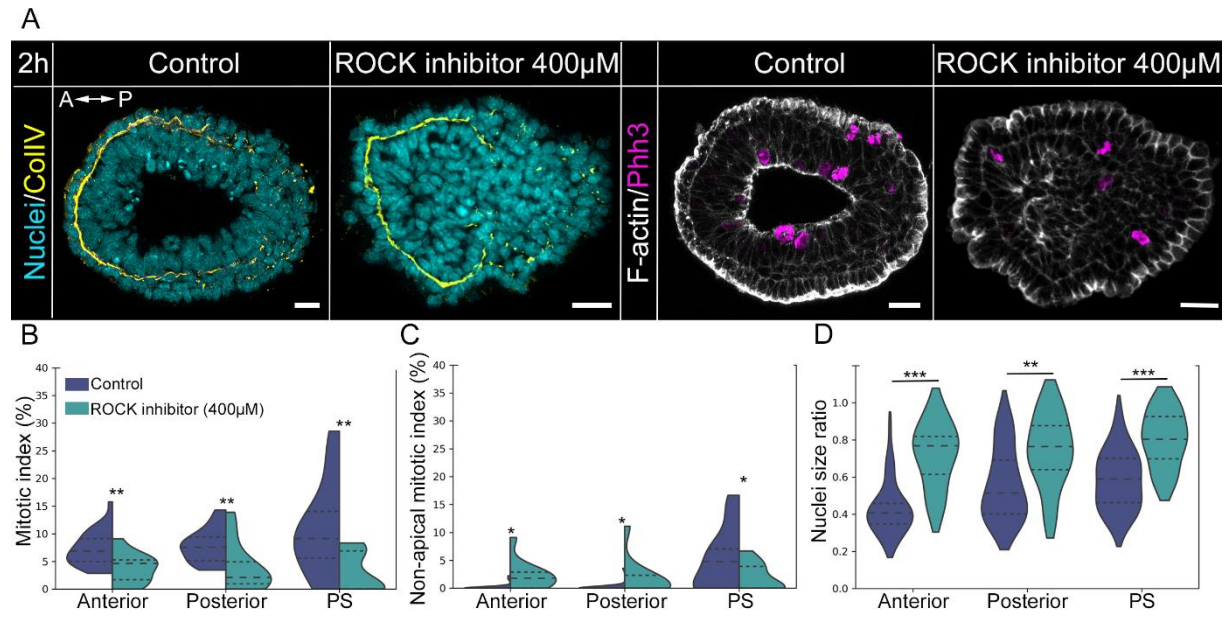



SUPPLEMENTARY 3:

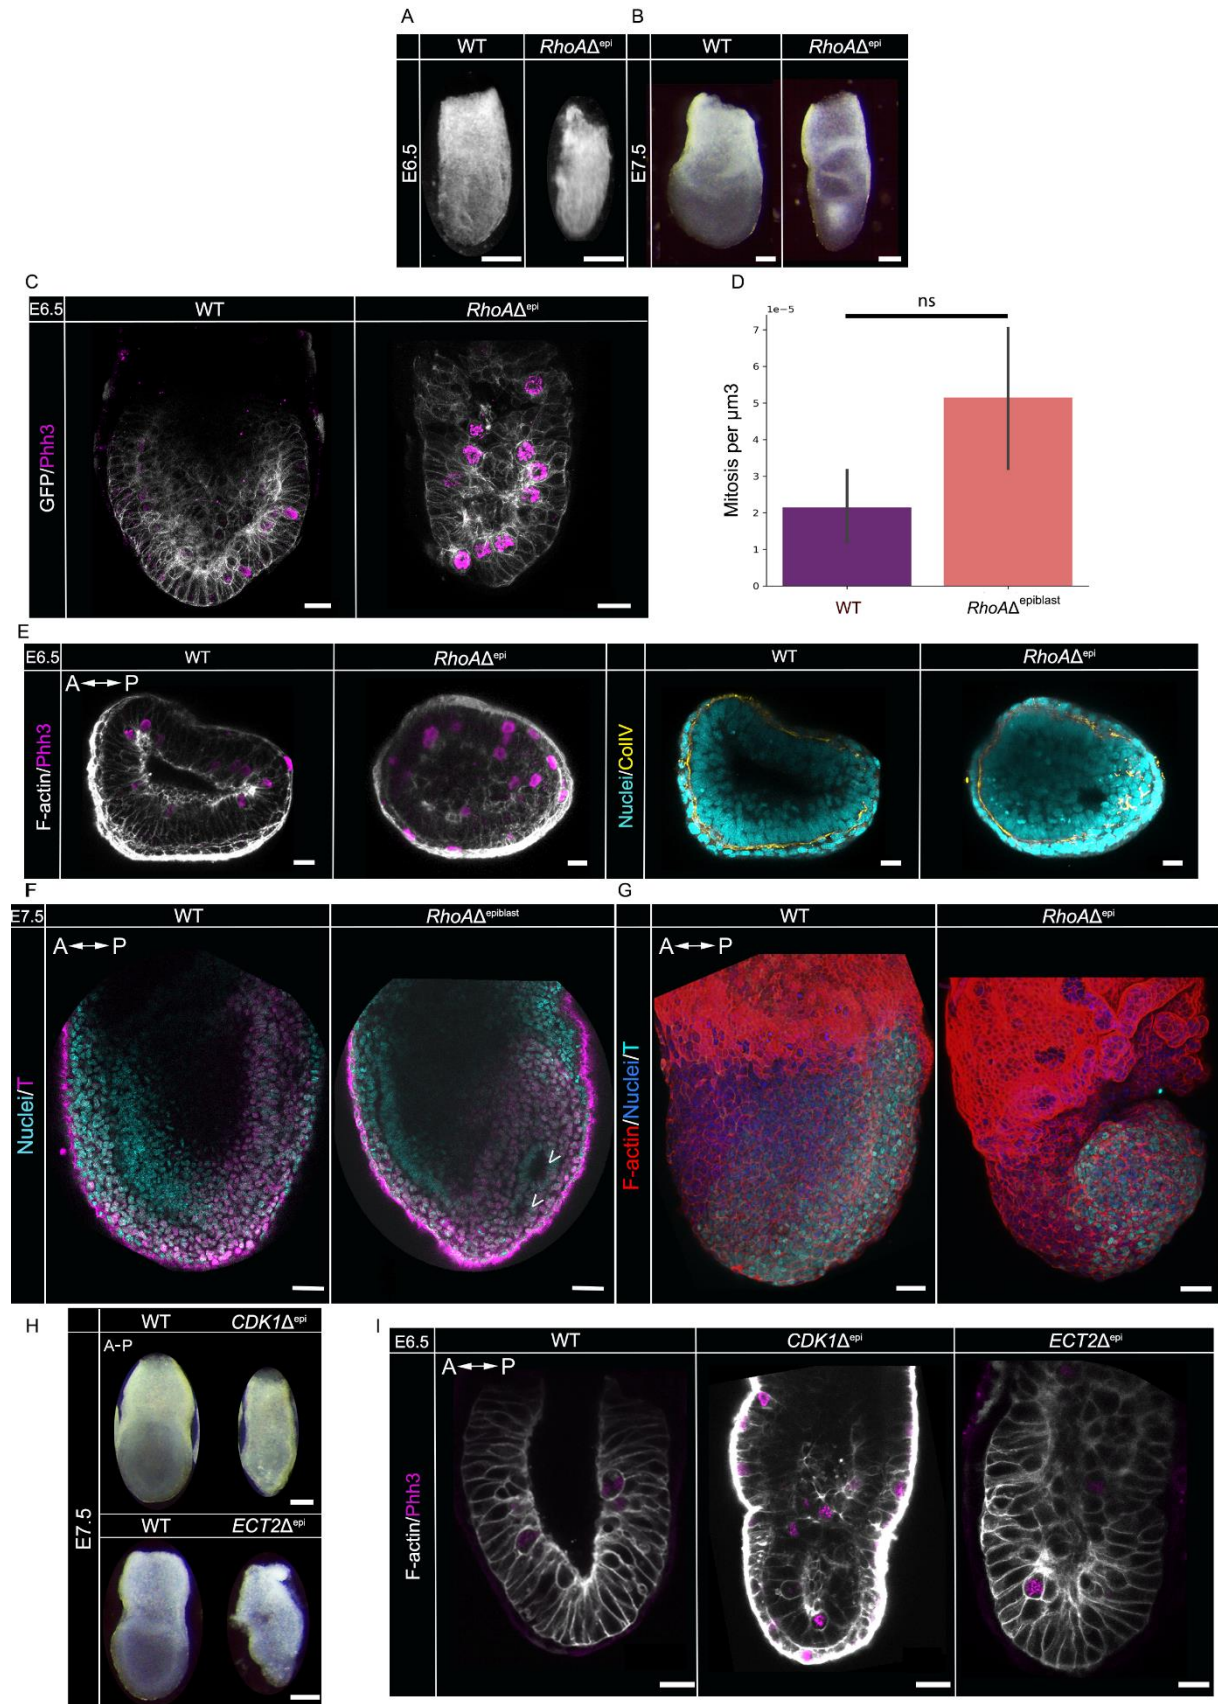

Source: https://www.biorxiv.org/content/10.1101/2024.01.24.577096.full.pdf
